# Supplementary material
Source: PubMed Central journal article supplement (PMC3788059)

## Figure S1A. Superfamily I ClustalX Alignment

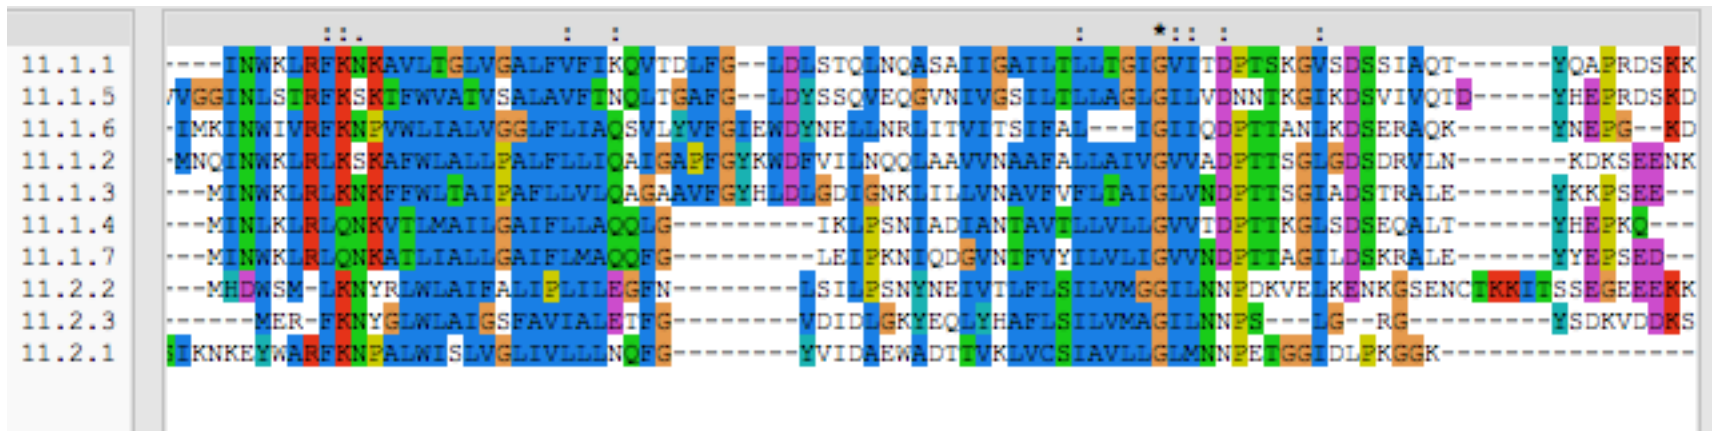

Figure S1B. Superfamily I  
Motif Alignment

| Name   | Start | <i>p</i> -value | Sites <input type="checkbox"/>                    |
|--------|-------|-----------------|---------------------------------------------------|
| 11.1.7 | 1     | 7.45e-29        | MINWKLRLQNKATLIALLGAIFLMAQQ FGLEIPKNIQ            |
| 11.1.2 | 3     | 6.68e-25        | MN QINWKLRLKSKAFWLALLPALFLLIQA IGAPFGYKWD         |
| 11.1.1 | 2     | 1.56e-23        | M DINWKLRFKNKAVLTGLVGALFVFIKQ VTDLEGLDLS          |
| 11.1.4 | 1     | 1.93e-23        | MINLKLRLQNKVTLMAILGAIFLLAQQ LGIKLPSNIA            |
| 11.1.6 | 5     | 1.22e-21        | MNIM KINWIVRFKNPVWLIALVGGFLIAQS VLYVFGIEWD        |
| 11.1.3 | 1     | 8.50e-21        | MINWKLRLKKNKFFWLTAIPAFLLVLQA GAAVFGYHLD           |
| 11.1.5 | 13    | 3.35e-17        | KKDKTPTVVG GINLSTRFKSKTFWVATVSALAVFTNQ LTGAFGLDYS |
| 11.2.1 | 7     | 2.52e-16        | MFNSIK NKEYWARFKNPALWISLVGLIVLLLNQ FGYVIDAEWA     |

Figure S1C. Superfamily I  
Consensus Motif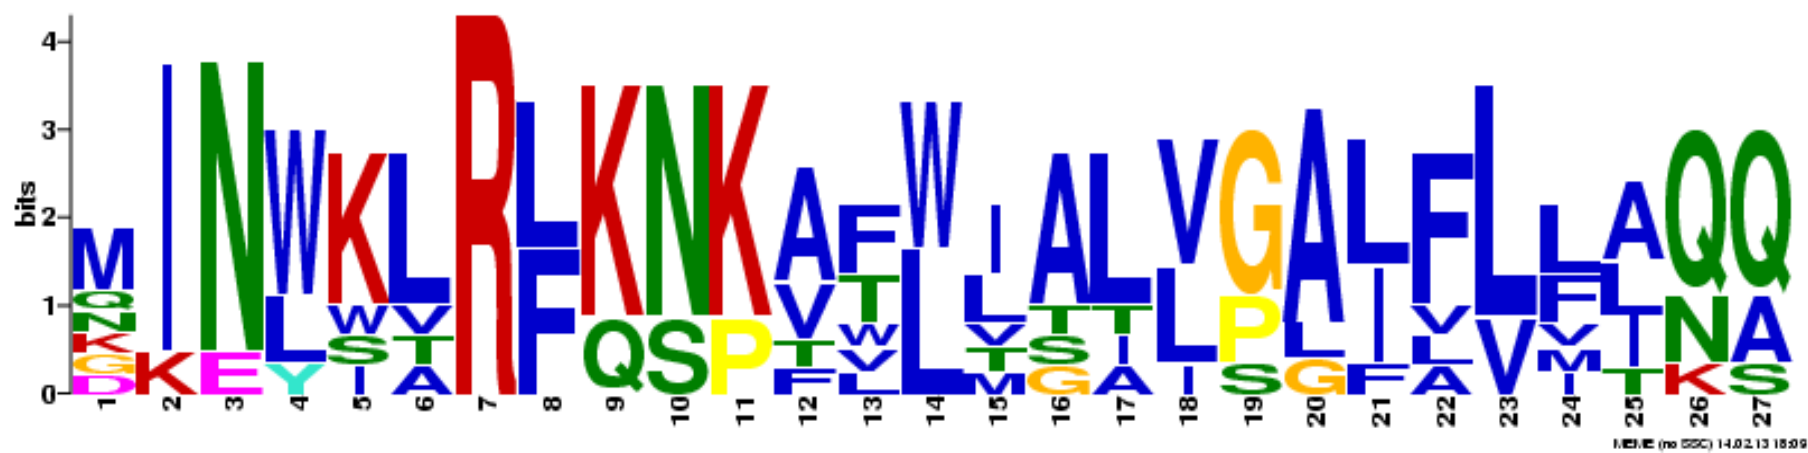

Figure S1D. Superfamily I  
Bootstrap Values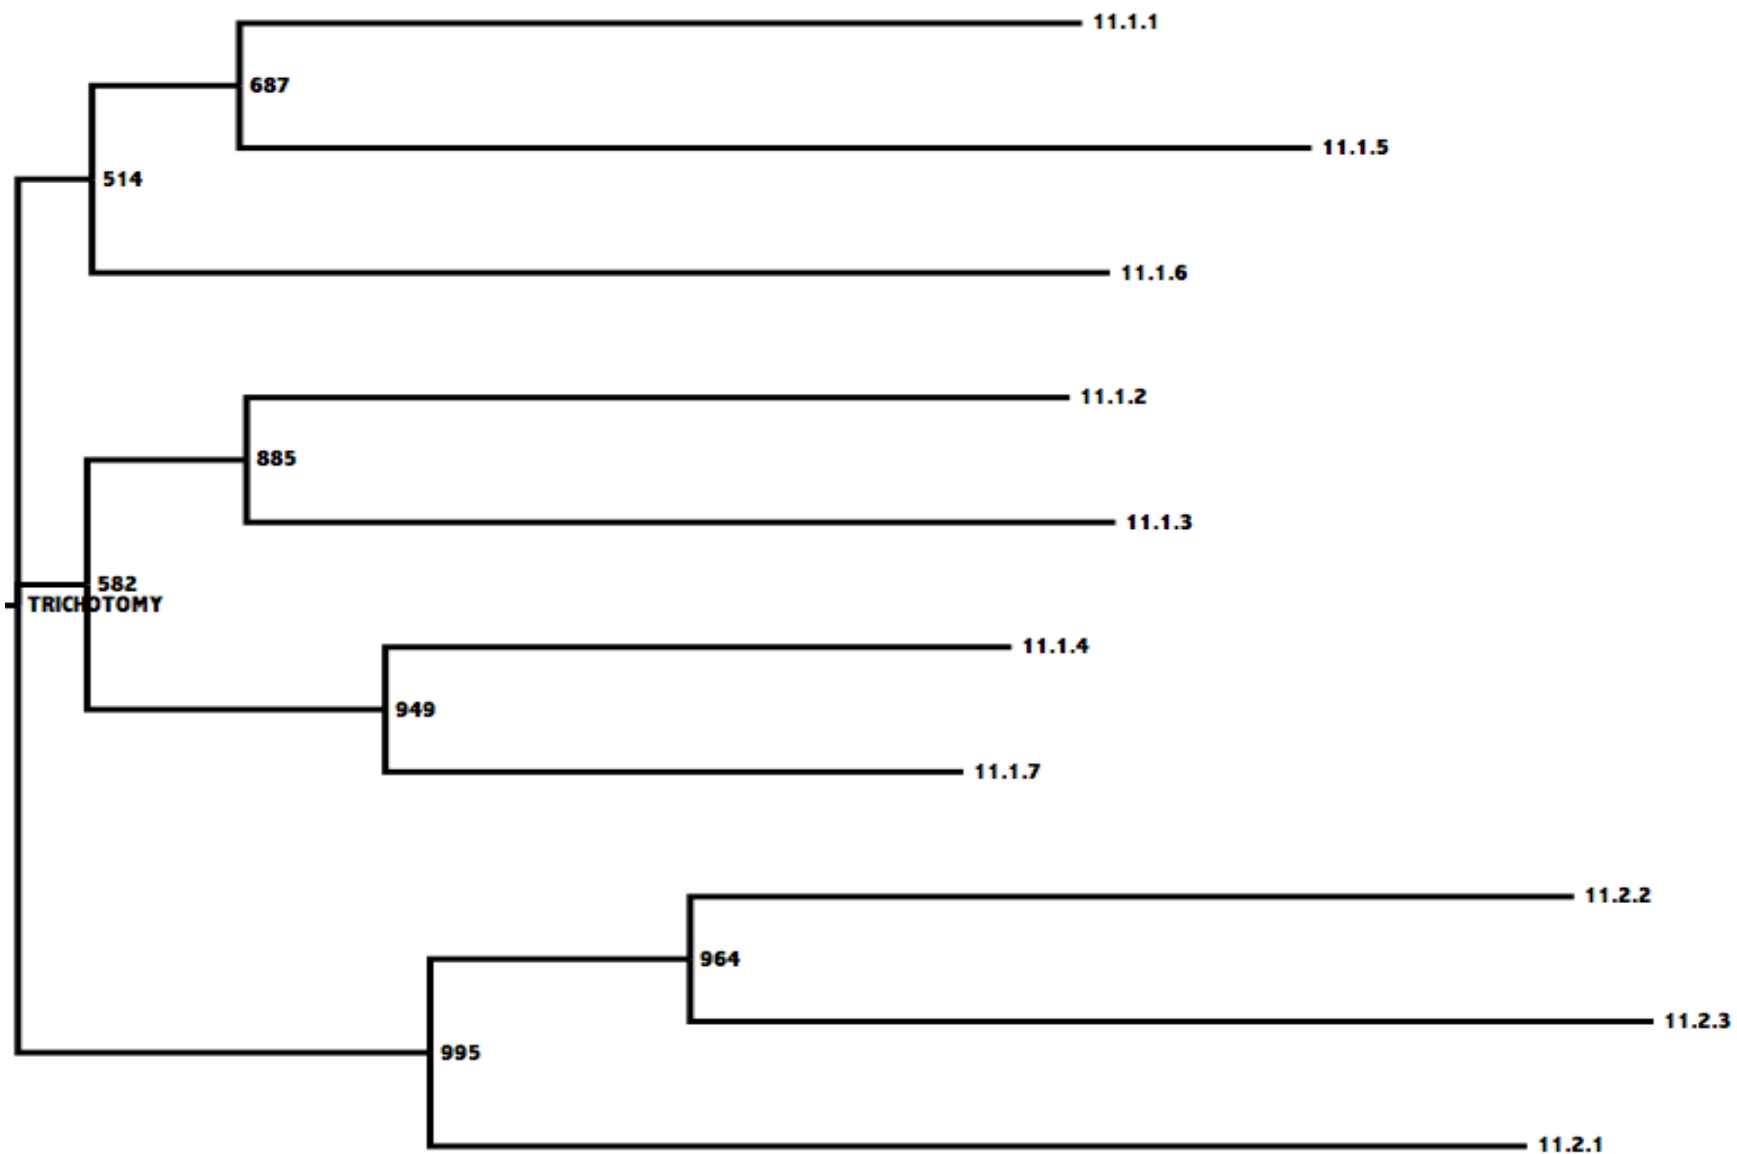

## Figure S2A. Superfamily II ClustalX Alignment

```

25.1.2 -----MRNETIDT LAAVGGKASVIG-VGMTGVGWFLSNEFFGL---VGALVAIGGLVLAW---YYKREANRQLVEHE
25.1.4 -----MKTETLEAIGAAGNKATIIIG-GSAVAVAGKMSAADLAAY---VGAAVAVIGLLITW---YYKREANRQAKEYE
25.1.5 -----MKQEA YEALAAAVASKATYGGAGGSFAGFMLSNEFVAL---VGLLIALAGFLVNW---HYRAAQDRDQIEHE
1.1.1 -----MKSMDKLSTGIAYGTSAGSAGYWFLOWLDQVSPSQWAAIGVLGSLVLGFLTYYLTNL---YFKIREDRKAARG
1.1.2 -----MKSMDKLTTGVAYGTSAGNAGFWALQLLDKVTSPSQWAAIGVLGSLVFGLLTYLTNL---YFKIKEDRKAARG
1.1.3 -----MEKITTGVSYTTSAVGTGYWLLQLLDKVTSPSQWVAIGVLGSLLFGLLTYLTNL---YFKIREDRKAARG
1.1.4 -----MYRMDKLTGAAYGASAGSI---LNGMLNAYSPEQWNAIGVLVGIITAVMTYLTNL---YFKIREDNRSRSD
1.1.5 -----MSKLASGAAYGASAGTV---ANGLLTRLSPDEWSAVGVIAGIVVALLTFGINW---YFKRKTTLAQIQAYE
1.1.6 -----MNNIEKYTTGAYGASATTF---LCCGALS-LS---EWALV---LGIICSLLTVGLNW---YYRHK----EYRFRT
6.1.2 ---MS-LEVQFGDITVIRSVFVVGAAQVDV---VTRIF-GLT LSDWFYV---AAIGYTVVQAWAVL---YKTLK--R KEDK--
6.1.3 ---MAGLEIDFTNGVRAAPIAAGAGAEM---ASQVA-GMT LSDWFYA---AIIFYTIVQIVLV---FKITVMDEKRNKGD
6.1.1 ---MSLDFNNELIKAAPIVGTGADV---SARLFFGLSLNEWFYV---AAIAYTVVQIGAKV---VDKMIDWKANKE-
25.1.1 -----MSERAGMAVEVGVSVANKTTLAALAGALGWLAQINWVGL---IGVLVAVIGLLANI---YFVRRDRRESAESA
7.2.1 -----MAALFHCEGLMRASSEVASVYGVSVTAVASSLTLTDIGVI---VGIMTAIATFGLNF---FFMWRKDRREQRESI
25.1.3 -----MEPQPIVDKVAANVTYVG-SGWAVIFGLSANEFAAL---VGAAVAVVGLLVNL---WFKWQHLRIARTVAA
25.2.1 ---MPPALPRFKRSEHKAMEKITSFTIYAMALFLAWLGLKLSQDIAFL---VGAAVGIGTFLVNW---YYRKSLSQILKAIER
7.1.2 -----MRFNMLKNSEITGAYVGS---IAIYSGFTLADWAAI---FGILFGLFTMLINW---YYKNKEIKLKETALK
7.1.1 -----MNSKIDSAIFFIGS---LTALISGYSLHEWASL---FGILFGAVSVWIAYRKYKEDVQARDELAYK
6.2.4 -----MTKMTDFKIDAAVQASMNVPITIG-VAAATILGYTVSDWLVLG---AVLLTVLQLGYIVRKYWLLERGGKTD-----
6.2.1 -----MTTNDGATLADAAAYATRVAPPMAVIGASFLGLPLSEWVYI---VTIAYTLLQIAYFI---WKL VHNQLEKLRKD
6.2.2 ---RCCADFYFRSAFCCKTGVVVEAVKIAFVSVTAIFLGCQISDWSI---VTLTYTLGLLGHFI---WKL LVRPWRKRRLQ
6.2.3 -----MSNESKVQALIEAKAAFAV---AGAAASTMTLNHWVAIA---LGVYIVIQALYLLR---KWRBEERGKGGWLNEE

```

Figure S2B. Superfamily II  
Motif Alignment

| Name   | Start | <i>p</i> -value | Sites <span style="border: 1px solid black; padding: 0 2px;">?</span> |
|--------|-------|-----------------|-----------------------------------------------------------------------|
| 1.1.2  | 44    | 1.55e-19        | SQWAAIGVLG SLVFGLLTYLTNLYFKIKEDR RKAARGE                              |
| 1.1.3  | 41    | 2.09e-19        | SQWVAIGVLG SLLFGLLTYLTNLYFKIREDR RKAVRGE                              |
| 1.1.4  | 41    | 2.49e-18        | EQWNAIGVLV GIIIAVMTYLTNLYFKIREDN RRSRSRDEPN                           |
| 1.1.1  | 44    | 6.78e-18        | SQWAAIGVLG SLVLGFLTLYLTNLYFKIREDR RKAARGE                             |
| 7.1.2  | 36    | 2.77e-17        | FTLADWAAIF GILFGLFTMLINWYYKNKEIK LKETALKQKI                           |
| 1.1.6  | 35    | 1.57e-16        | LSLSEWALVT GIICSLTGLNWWYRHKYR FRTRNPS                                 |
| 1.1.5  | 38    | 7.88e-16        | DEWSAVGVIA GIVVALLTFGINWYYKRKTTL AQIQAYERWP                           |
| 25.1.5 | 40    | 2.05e-15        | MLSNEFVALV GLLIALAGFLVNWHYRAAQDR RDQIEHEARL                           |
| 25.2.1 | 48    | 2.47e-15        | LSPQDIAFLV GAAVGIGTFLVNWYYRRKSLQ ILKAIERNAT                           |
| 7.2.1  | 42    | 1.24e-14        | LTLTDIGVIV GIMTAIATFGLNFFFMWRKDR REQRESDMRI                           |
| 25.1.1 | 43    | 1.36e-14        | LAQINWVGLI GVLVAVIGLLANIYFQVRRDR RESAESAARI                           |
| 25.1.3 | 37    | 1.62e-14        | LSANEFAALV GAAVAVGLLVNLWFKWQHLR IARTVAATRK                            |
| 25.1.4 | 39    | 2.94e-14        | MSAADLAAYV GAAVAVIGLLITWYYKREANR RQAKEYERWE                           |
| 25.1.2 | 39    | 7.17e-13        | FLSNEFFGLV GALVAIGGLVLAWYYKREANR RQLVEHELRLV                          |
| 6.2.2  | 40    | 2.06e-11        | AQVIQVSHRL KAVFCFCRCCADFYFRSAPCK KTGVVVEAVK                           |

Figure S2C. Superfamily II  
Consensus Motif

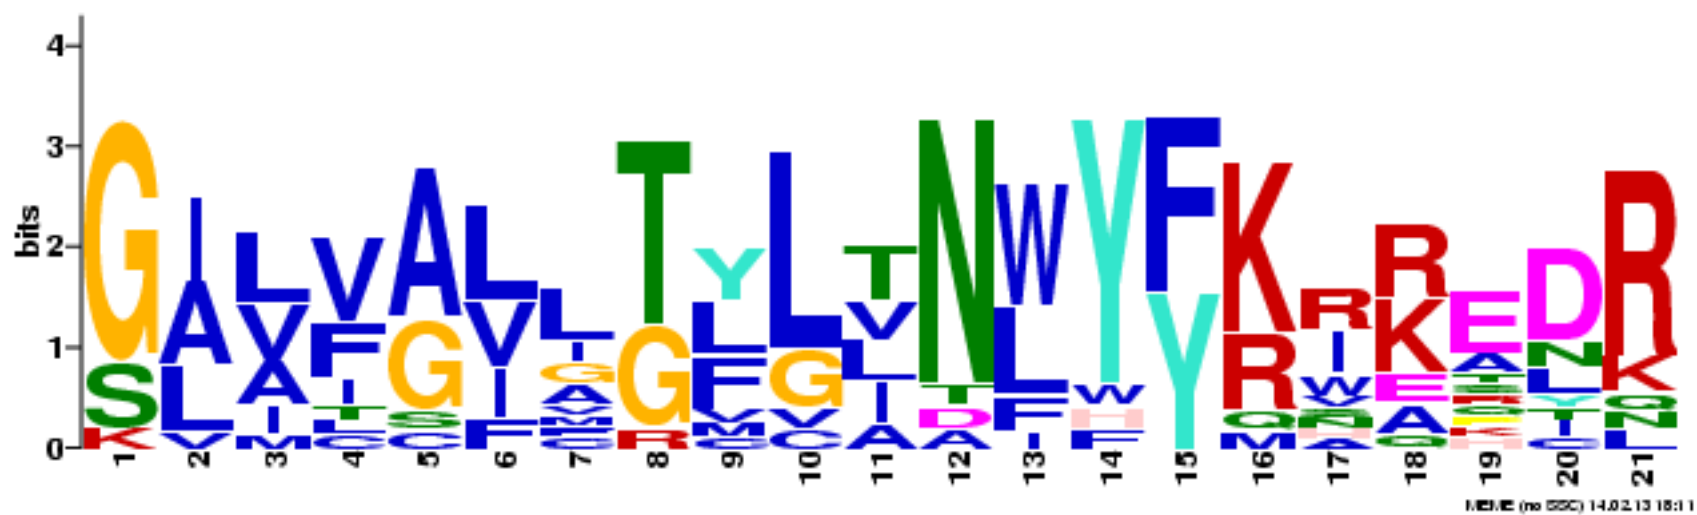

Figure S2D. Superfamily II  
Bootstrap Values

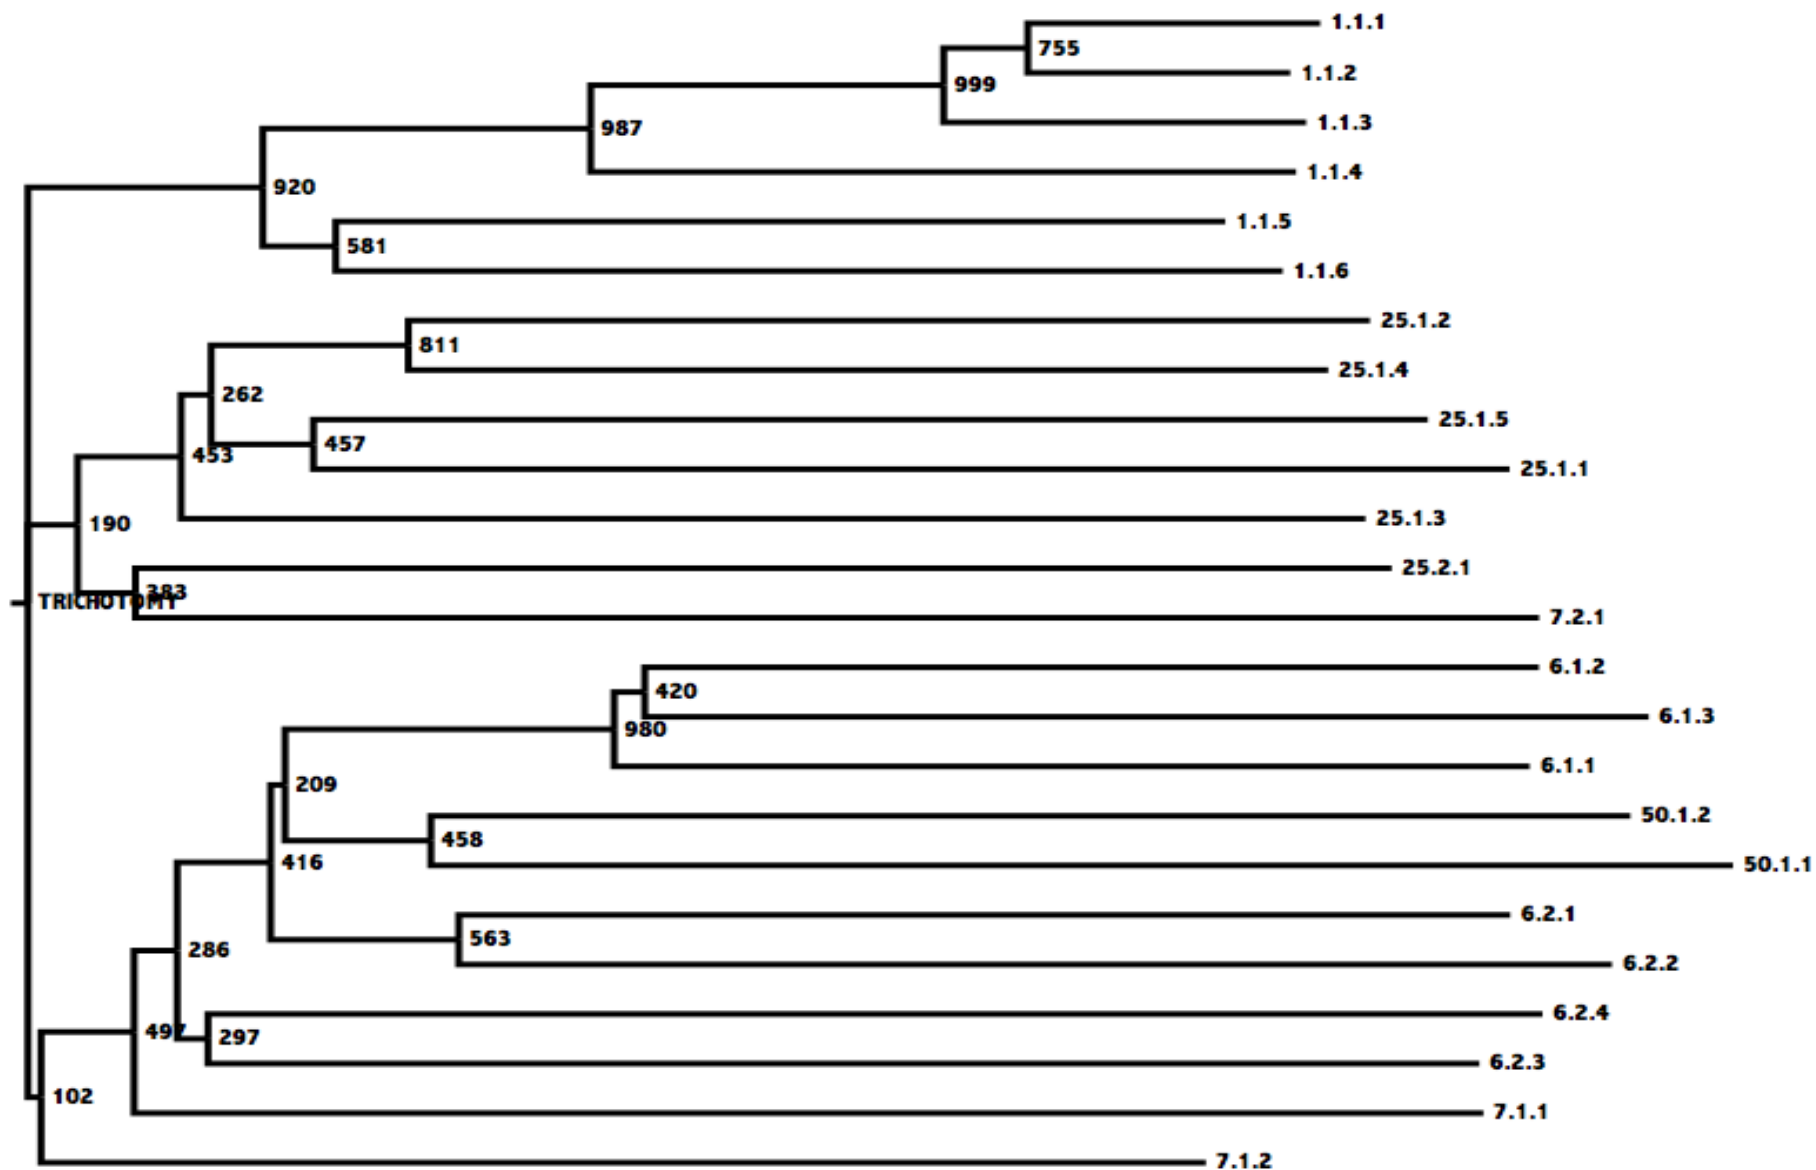



# Figure S3A. Superfamily III ClustalX Alignment

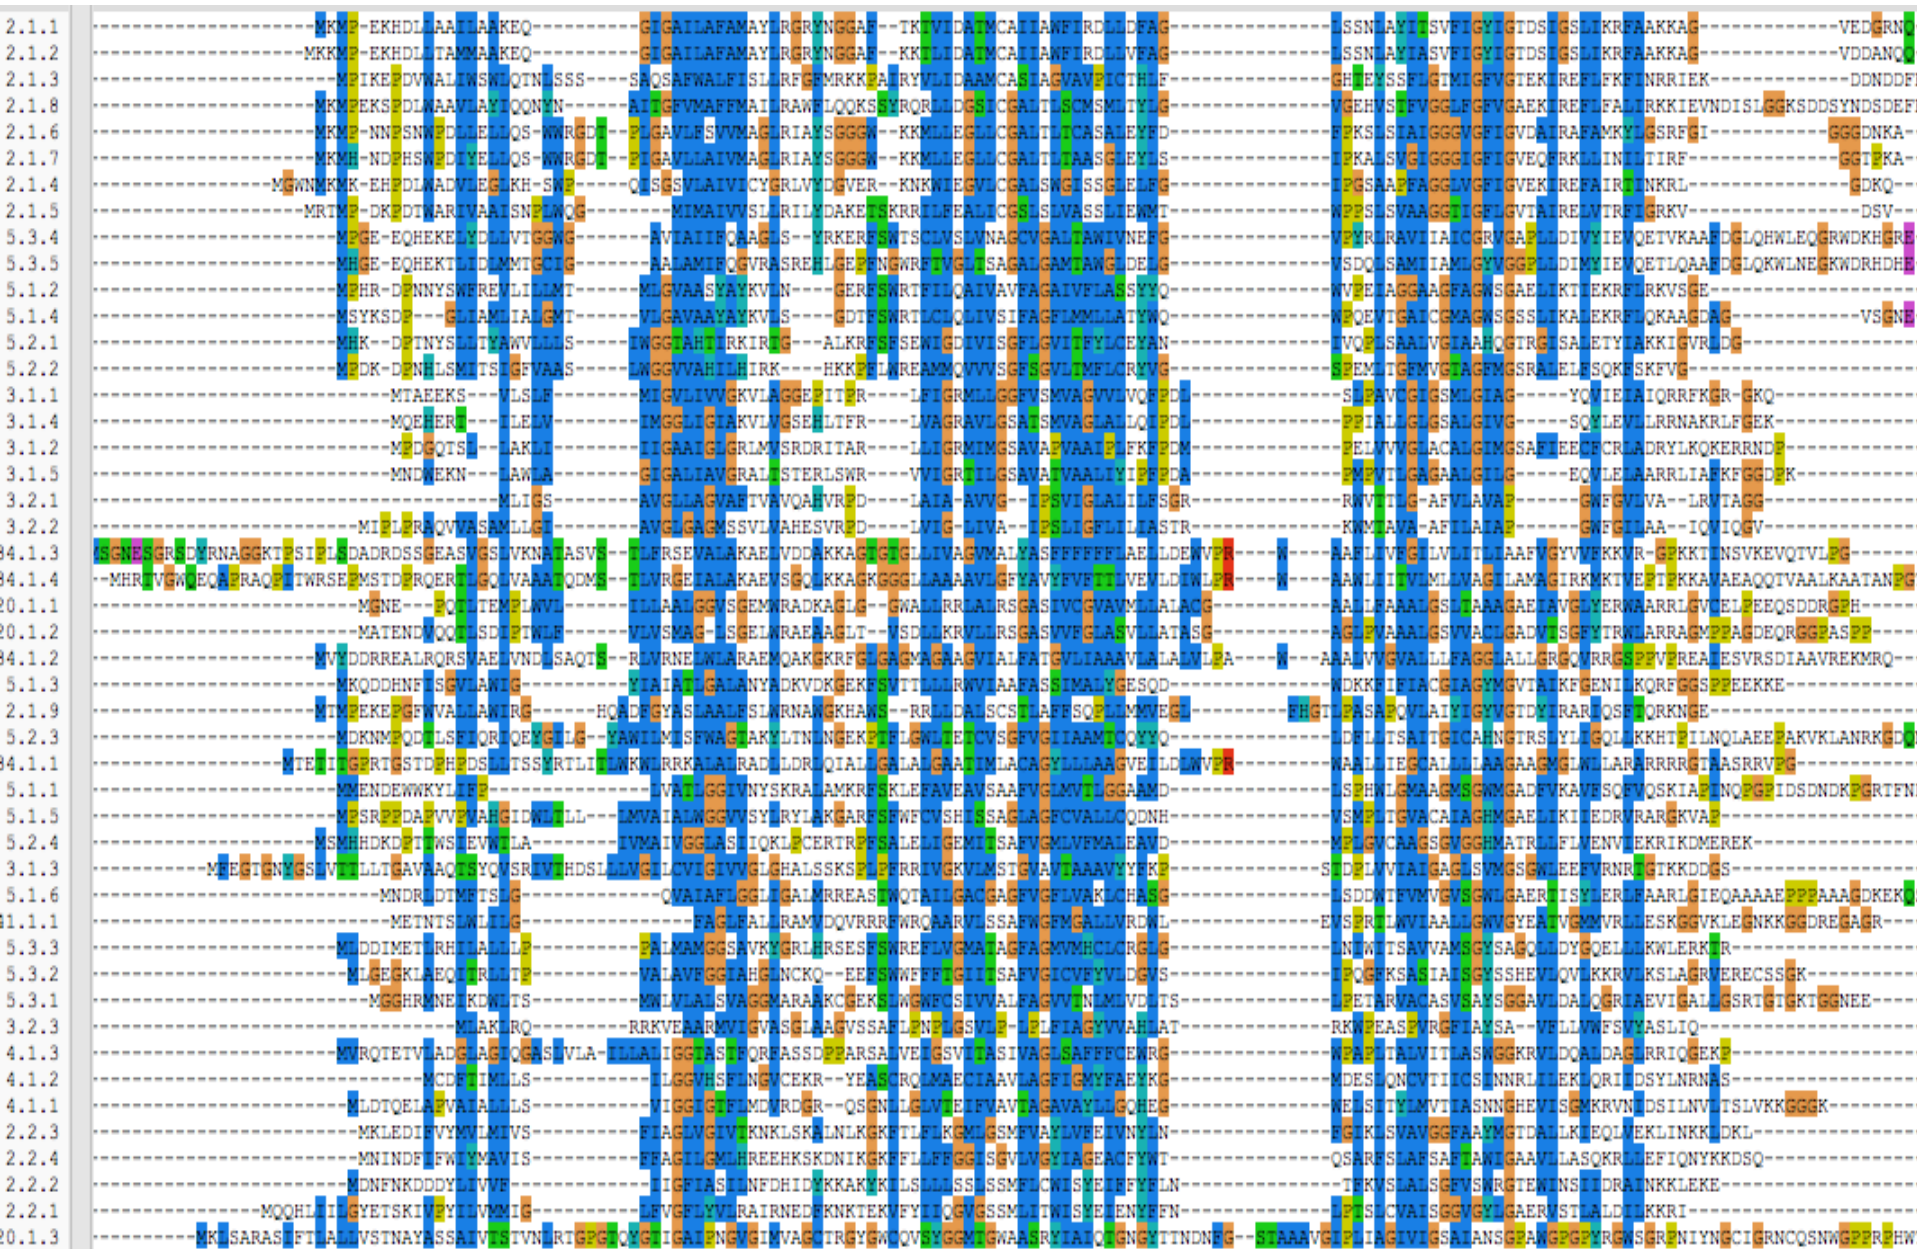

# Figure S3B. Superfamily III Motif Alignment

| Name   | Start | p-value  | Sites  |                       |                 |
|--------|-------|----------|-------------------------------------------------------------------------------------------|-----------------------|-----------------|
| 5.1.5  | 82    | 6.96e-11 | DNHVSMP                                                                                   | LTG VACAIAGHMGAELIK   | IIEDRVRARG      |
| 2.1.3  | 81    | 6.96e-11 | HLFGHTEYSS                                                                                | FLGTMIGFVGT           | EFLFKFINRR      |
| 5.1.3  | 75    | 9.43e-11 | SQDWDKKFIF                                                                                | IACGIAGYMGVTAIK       | FGENILKQRF      |
| 5.1.4  | 72    | 5.16e-10 | YWQWPQEV                                                                                  | TG AICGMAGWSGSSLIK    | ALEKRFLQKA      |
| 2.1.4  | 82    | 5.16e-10 | LFGIPGSAAP                                                                                | FAGGLVGF              | EF              |
| 5.1.2  | 74    | 5.90e-10 | YYQWVPEIAG                                                                                | GAAGFAGWSGAELIK       | TIEKRFLRKV      |
| 2.1.8  | 81    | 8.72e-10 | YLGVGEHVST                                                                                | FVGGLFGFVGAEKIR       | EFLFALIRKK      |
| 2.1.6  | 81    | 1.64e-09 | YDFPKSLSI                                                                                 | AIGGGVGF              | AFAMKYLGSR      |
| 2.1.9  | 85    | 2.09e-09 | HGTLPASAPQ                                                                                | VLAIYIGYVGT           | ARIQSFTQRK      |
| 5.1.1  | 70    | 2.66e-09 | AMDLSPHWL                                                                                 | G MAAGMSGWMA          | AVFSQFVQSK      |
| 2.2.1  | 83    | 1.04e-08 | FFNLPTSLCV                                                                                | AISGGVGYLGAERVS       | TLALDILKKR      |
| 2.1.5  | 79    | 1.60e-08 | WMTWPPSLSV                                                                                | AAGGTIGFLGVT          | ELVTRFIGRK      |
| 2.2.3  | 73    | 2.18e-08 | YLNFGIKLSV                                                                                | AVGGFAAYMGT           | KIEQLVEKLI      |
| 2.1.2  | 75    | 2.67e-08 | FAGLSSNLAY                                                                                | IASVFIGYIGT           | SLIKRFAAKK      |
| 2.1.7  | 81    | 4.40e-08 | YLSIPKALSV                                                                                | GIGGGIGFIGVEQFR       | KLLINILTIR      |
| 5.2.2  | 75    | 5.35e-08 | YVGSPEMLTG                                                                                | FMVGTAGFMGSR          | LFSQKFSKFV      |
| 3.1.1  | 66    | 5.89e-08 | FPDLSLP                                                                                   | AVC GIGSMLGIAGYQVIE   | IAIQRRFKGR      |
| 2.1.1  | 74    | 1.04e-07 | FAGLSSNLAY                                                                                | ITSVFIGYIGT           | SLIKRFAAKK      |
| 2.2.2  | 71    | 1.36e-07 | YFLNTFKVSL                                                                                | ALSGFVSWRGTEWIN       | SIIDRAINKK      |
| 5.3.5  | 77    | 1.78e-07 | ELGVSDQLSA                                                                                | MIIAMLG               | IMYIEVQETL      |
| 5.2.1  | 75    | 2.53e-07 | YANIVQPLSA                                                                                | ALVGIAAHQGT           | ALETYIAKKI      |
| 5.2.3  | 83    | 3.57e-07 | YYQLDFLLTS                                                                                | AITGICAHNGTRS         | LIGQLLKKHT      |
| 5.1.6  | 68    | 4.22e-07 | ASGLSDDWTF                                                                                | VMVGVSGWLGAERTI       | SYLERLFAAR      |
| 5.3.3  | 75    | 7.49e-07 | GLGLNIWITS                                                                                | AVVAMSGYSAGQLLD       | YGQELLLKWL      |
| 4.1.1  | 71    | 7.49e-07 | HEGWELSITY                                                                                | LMVTIASNNGHEVIS       | GMKRVNIDSI      |
| 41.1.1 | 65    | 9.51e-07 | WLEVSPRTLW                                                                                | VIAALLGWVGYEATV       | GMMVRLLESK      |
| 3.1.4  | 66    | 1.03e-06 | IPDLPPIAL                                                                                 | L GLGSALGIVGSQYLE     | VLLRRNAKRL      |
| 5.3.4  | 75    | 1.11e-06 | EFGVPYRLRA                                                                                | VIIAICGRVGA           | IVYIEVQETV      |
| 2.2.4  | 17    | 1.40e-06 | IFWIYMAVIS                                                                                | FFAGILGMLHREEHK       | SKDNIKGF        |
| 3.1.2  | 67    | 1.90e-06 | FPDMP                                                                                     | ELVVV GLACALGIMGSAFIE | ECFCRLADRY      |
| 34.1.3 | 120   | 2.75e-06 | IVFGILV                                                                                   | LIT LIAAFVGYVVF       | GPKKTINSVK      |
| 5.3.2  | 72    | 2.75e-06 | GVSIPQGF                                                                                  | KS ASIAISGYSSHEVLQ    | VLKKRVLKSL      |
| 5.2.4  | 57    | 3.18e-06 | LELIGEMITS                                                                                | AFVGMLVFMAL           | EAVD MPLGVCAAGS |

Figure S3C. Superfamily III  
Consensus Motif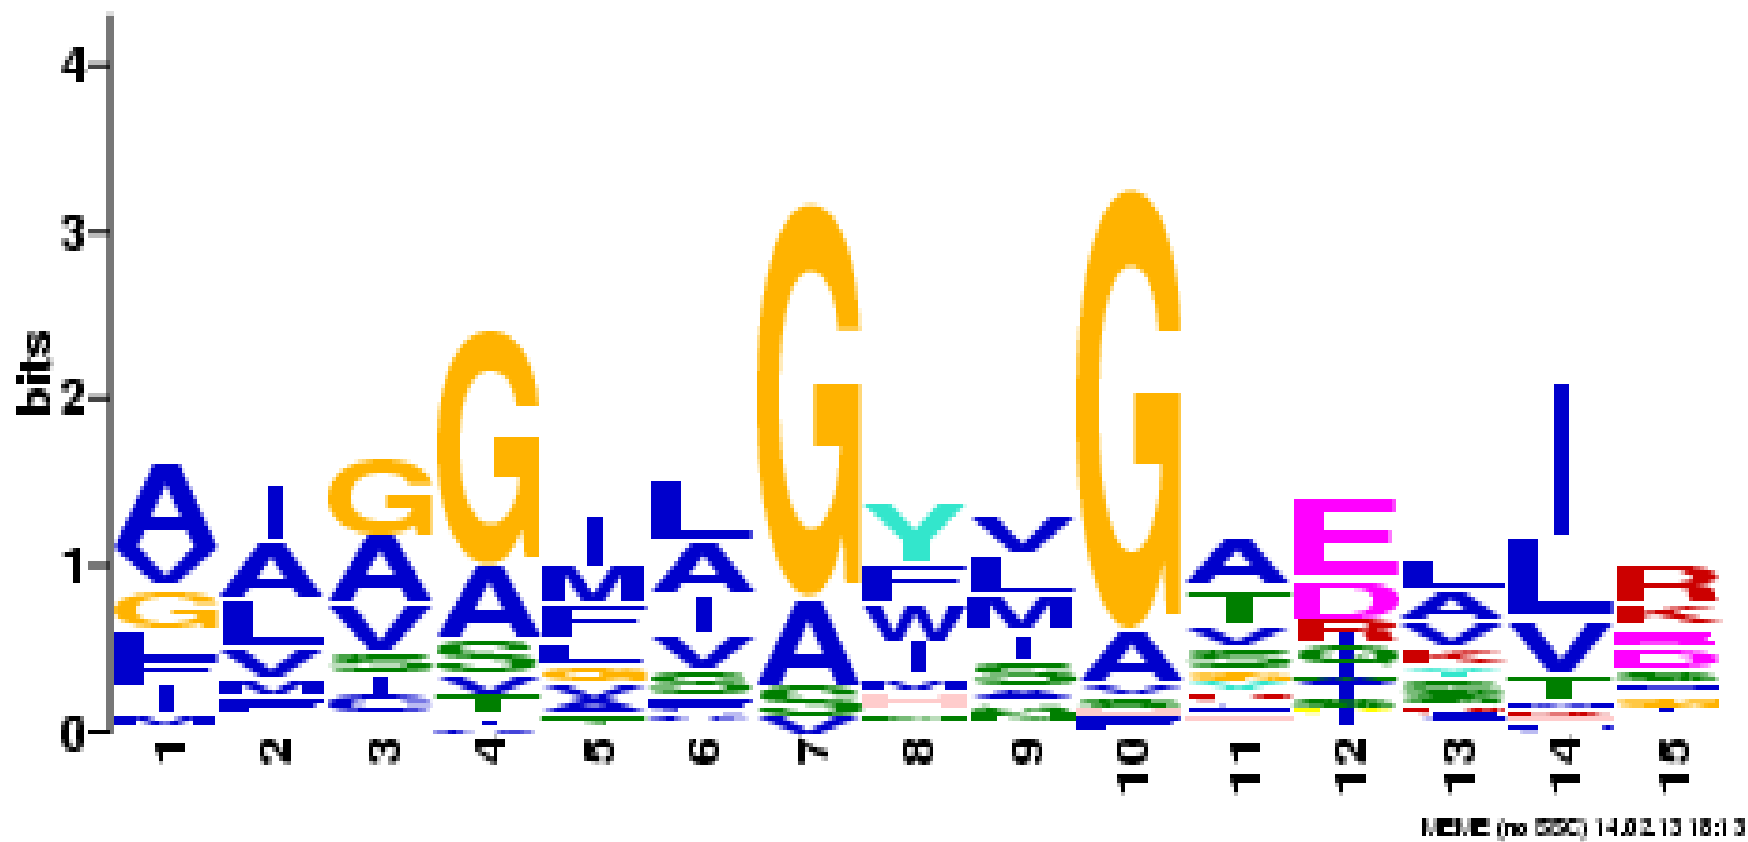

# Figure S3D. Superfamily III

## Bootstrap Values

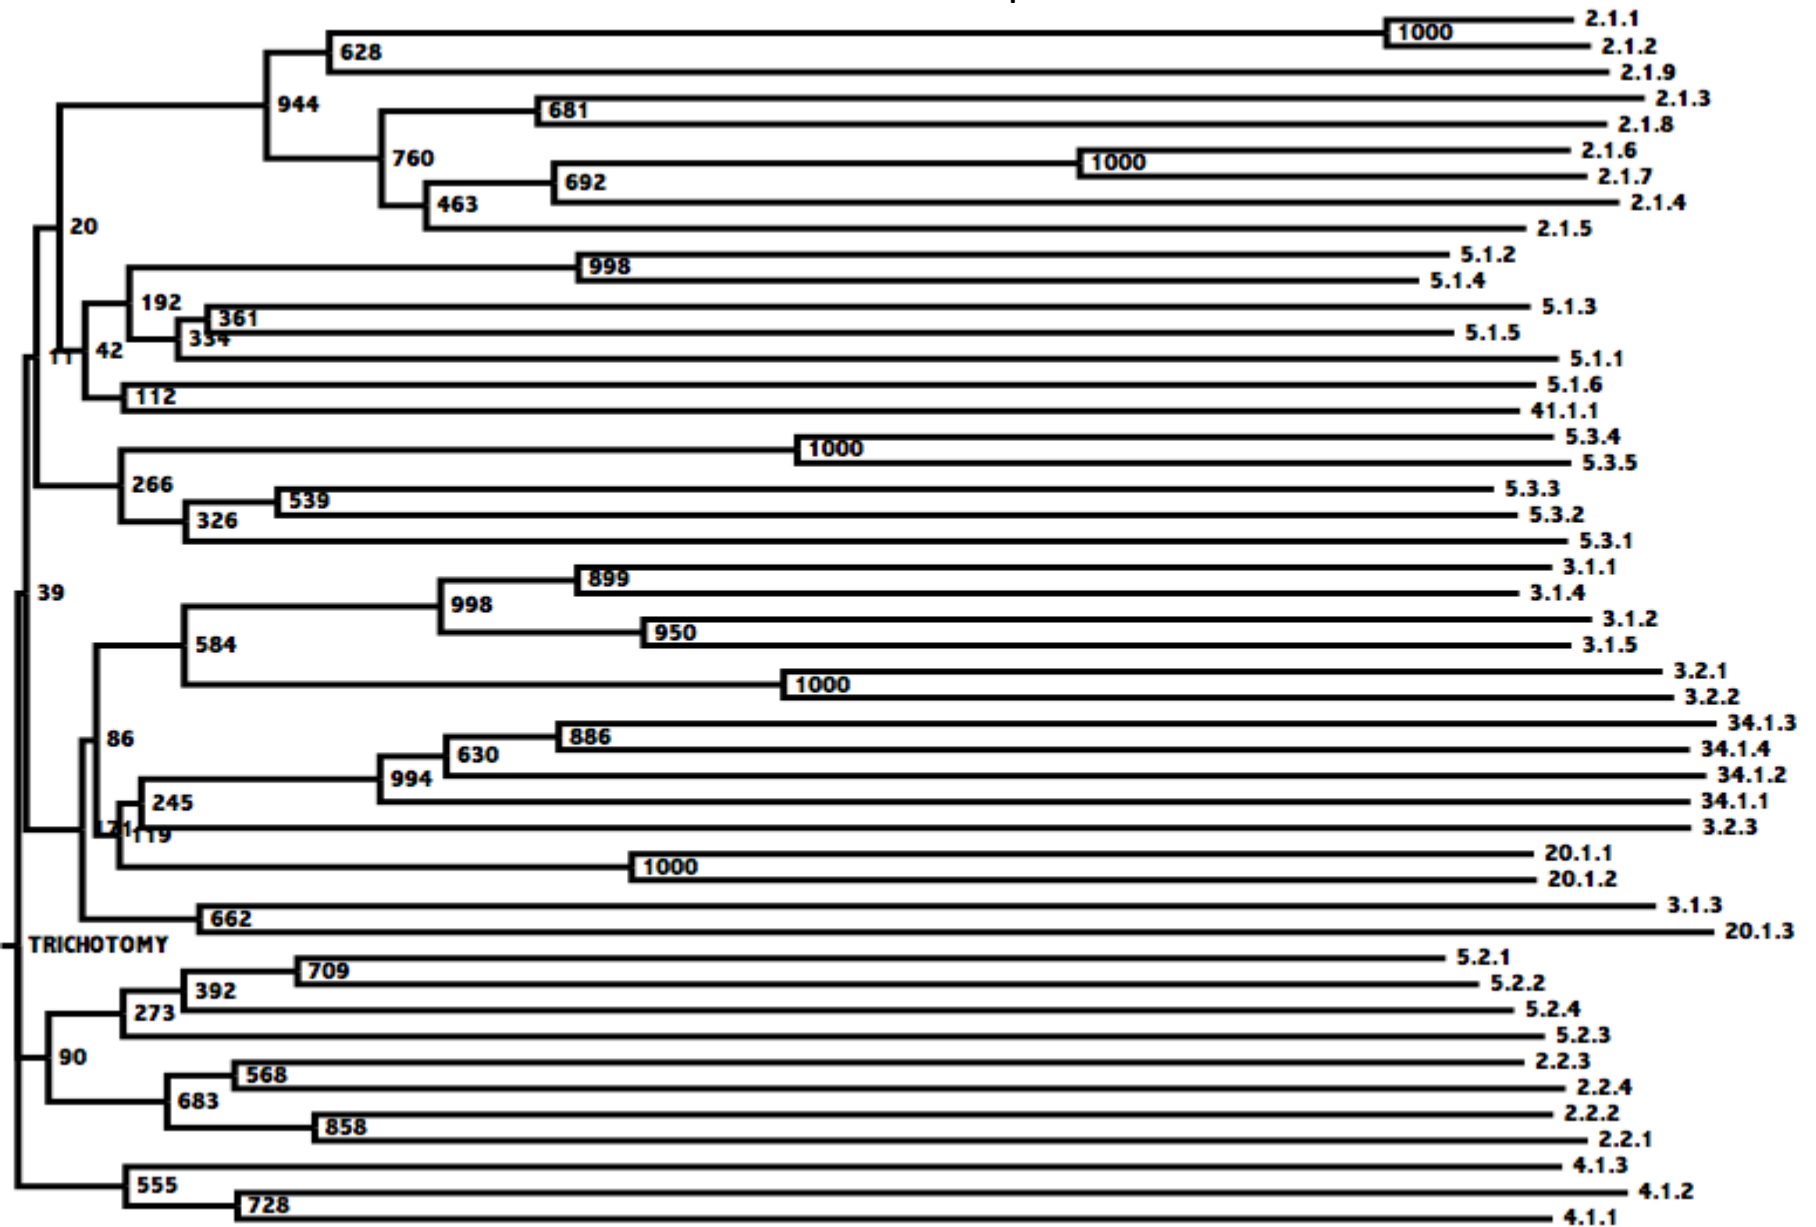



# Figure S4A. Superfamily IV ClustalX Alignment

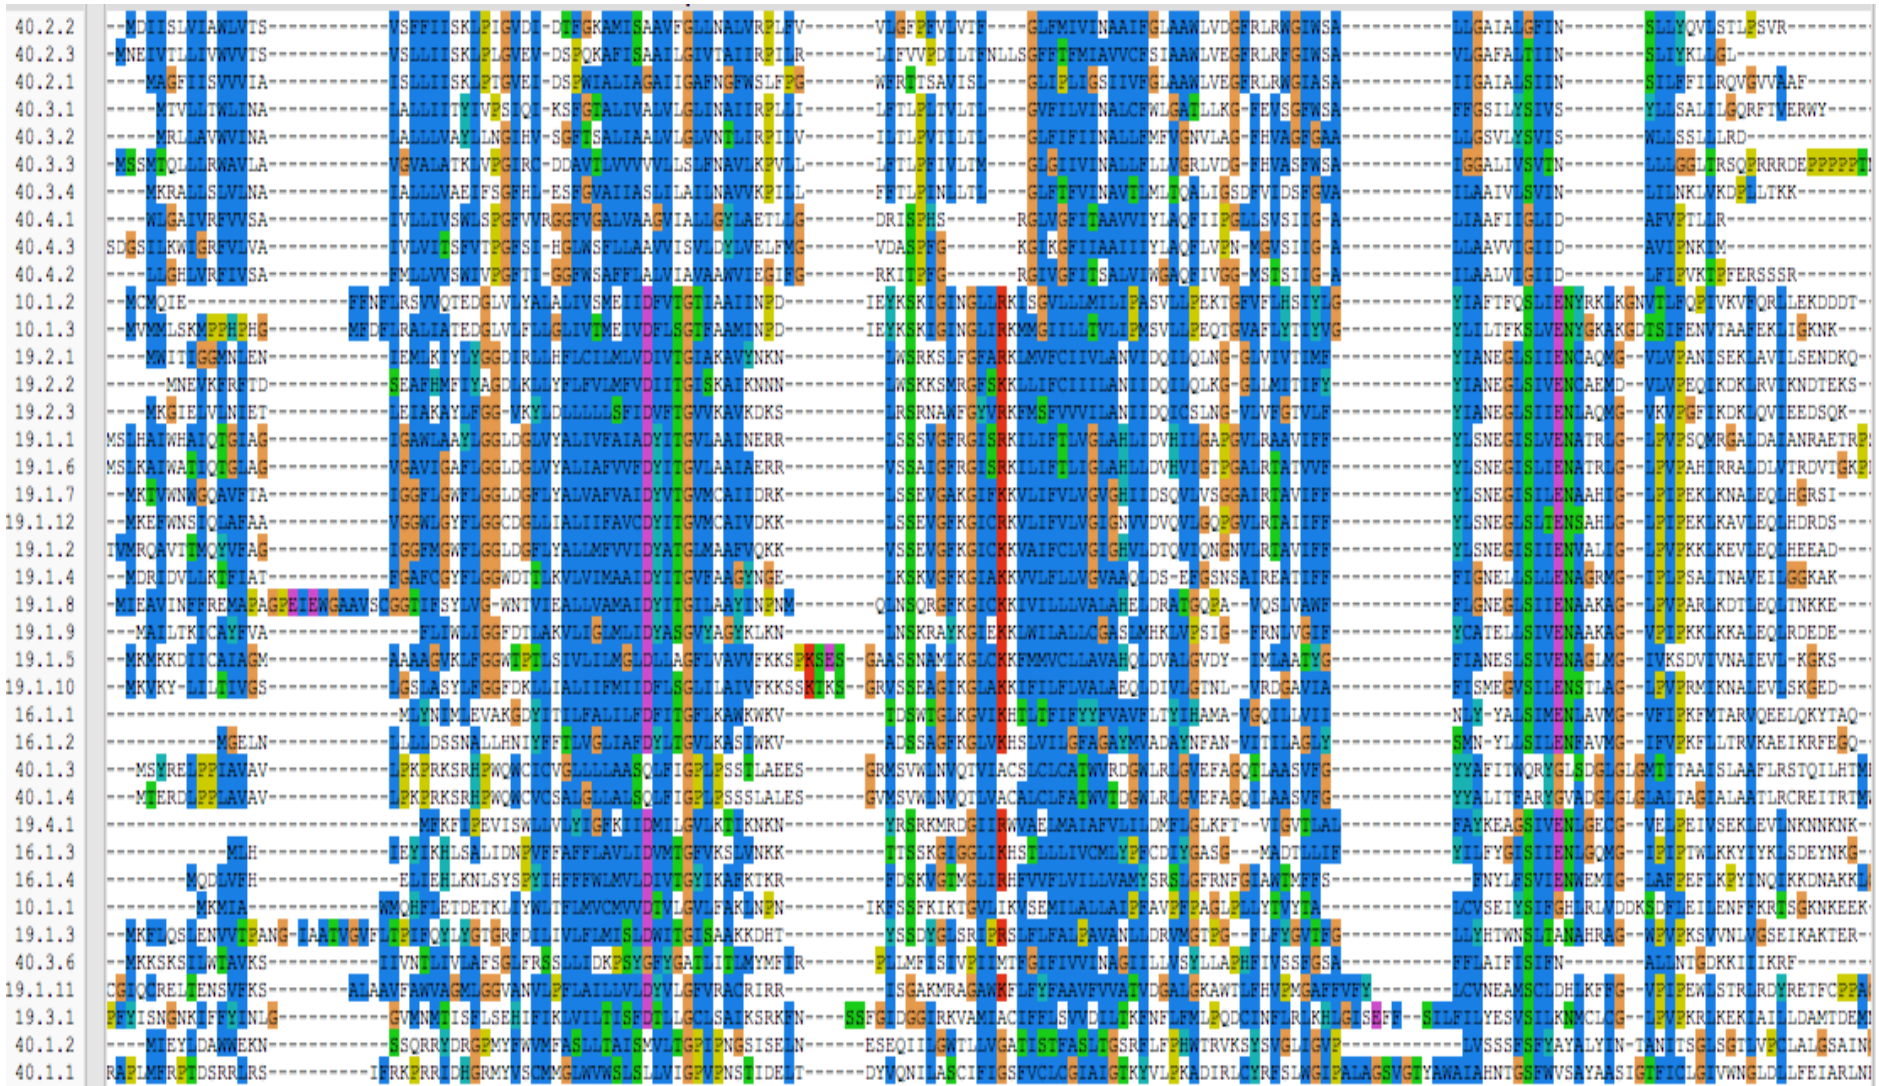

Figure S4B. Superfamily IV  
Motif Alignment

| Name    | Start | p-value  | Sites <span style="border: 1px solid black; padding: 0 2px;">?</span> |                                 |            |
|---------|-------|----------|-----------------------------------------------------------------------|---------------------------------|------------|
| 19.1.7  | 98    | 5.64e-28 | GAIRTAVIFF                                                            | YLSNEGISILENAAHIGLPIPEKLNAL     | QLHGRSIEED |
| 19.2.3  | 94    | 2.71e-25 | GVLVFGTVLF                                                            | YIANEGLSIIENLAQMGVKVPGFIKDKLQ   | VIEEDSQKEK |
| 19.1.2  | 141   | 2.71e-25 | NVLRTAVIFF                                                            | YLSNEGISIIENVALIGLPVPKKLKEVLE   | QLHEEADEKK |
| 19.2.2  | 93    | 7.55e-25 | GGLLMITIFY                                                            | YIANEGLSIVENCAEMDVLVPEQIKDKLR   | VIKNDTEKSD |
| 19.2.1  | 95    | 1.77e-24 | GGLVIVTIMF                                                            | YIANEGLSIIENCAQMGVLV PANISEKLA  | VILSENDKQS |
| 19.1.8  | 110   | 1.77e-24 | PAVQSLVAWF                                                            | FLGNEGLSIIENAAKAGLPV PARLKD TLE | QLTNKKEERK |
| 19.1.11 | 98    | 3.07e-24 | GVLRTAIIFF                                                            | YLSNEGSLTENS AHLGLPIPEK LKAVLE  | QLHDRDSEEE |
| 19.1.9  | 92    | 4.62e-24 | IGFRNLVGIF                                                            | YCAT ELLSIVENAAKAGVPIPKKLK KALE | QLRDEDEK K |
| 19.1.6  | 100   | 1.01e-22 | GALRTATVVF                                                            | YLSNEGISLIENATRLGLPVP AHIRRALD  | LVTRDVTGKP |
| 19.1.1  | 108   | 1.85e-22 | GVLRAAVIFF                                                            | YLSNEGISLVENATRLGLPVP SQMRGALD  | AIANRAETRP |
| 19.1.10 | 103   | 5.11e-21 | NLVRDGAVIA                                                            | FISMEGVSILENSTLAGLPVPRMIK NAL   | VLSKGEDK K |
| 16.1.3  | 85    | 9.77e-21 | SGMADTLLIF                                                            | YILFYGISIIENLGQMGIP IPTWLK KYIY | KLSDEYNKGD |
| 19.1.4  | 97    | 1.21e-20 | SAIREATIFF                                                            | FIGN ELLSLENAGR MGIP LPSALTNAVE | ILGGKAKQET |
| 16.1.2  | 87    | 2.88e-19 | ANVITILAGL                                                            | YSMNYLLSILENF AVMGIFVPK FLLTRVK | AEIKRFEGQL |
| 19.3.1  | 122   | 1.01e-18 | LGISEFFSIL                                                            | FILY ESVSILKNMCLCGLPVPKRLKEKIA  | ILLDAMTDEM |
| 19.1.5  | 104   | 1.22e-17 | DYIMLAATYG                                                            | FIANESLSIVENAGLMGIVKSDVIVNAIE   | VLKGSQKIE  |
| 16.1.1  | 81    | 3.51e-17 | MAVGQILLVI                                                            | INLYYALSIMENLAVMGVFI PKFMTARVQ  | EELQKYTAQL |
| 19.4.1  | 80    | 1.17e-16 | FTVIGVTLAL                                                            | FAYKEAGSIVENLGECGV ELPEIVSEKLE  | VLNKNKNKE  |
| 19.5.1  | 116   | 1.78e-16 | VPMGAFFV FY                                                           | LCVNEAMSCLDHLKFFGVPIPEWLSTR LR  | DYRETFCPPA |
| 16.1.4  | 88    | 2.70e-16 | RNFGIAWTMF                                                            | FSFN YLFSVIENWEMIGLAFPEFLKPYIN  | QIKKDNAKKL |
| 19.1.3  | 108   | 4.35e-14 | GFLFYGVTFG                                                            | LLYHTWNSLTANAHRAGWPVPKSVVNLVG   | SEIKAKTERA |

Figure S4C. Superfamily IV  
Consensus Motif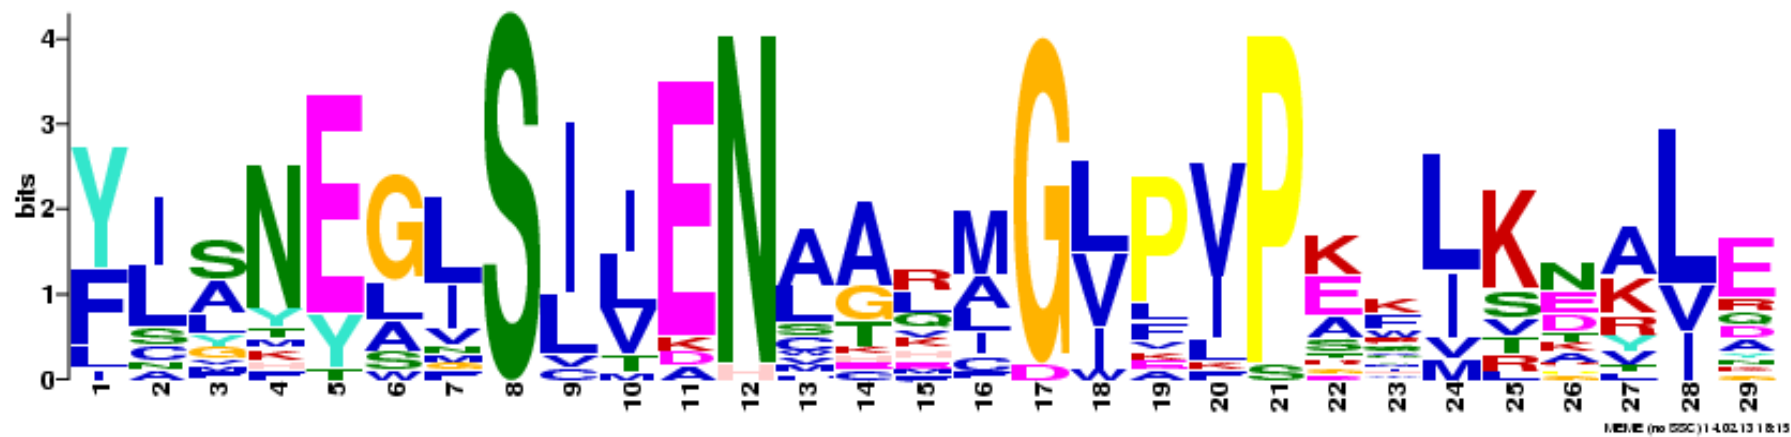

# Figure S4D. Superfamily IV

## Bootstrap Values

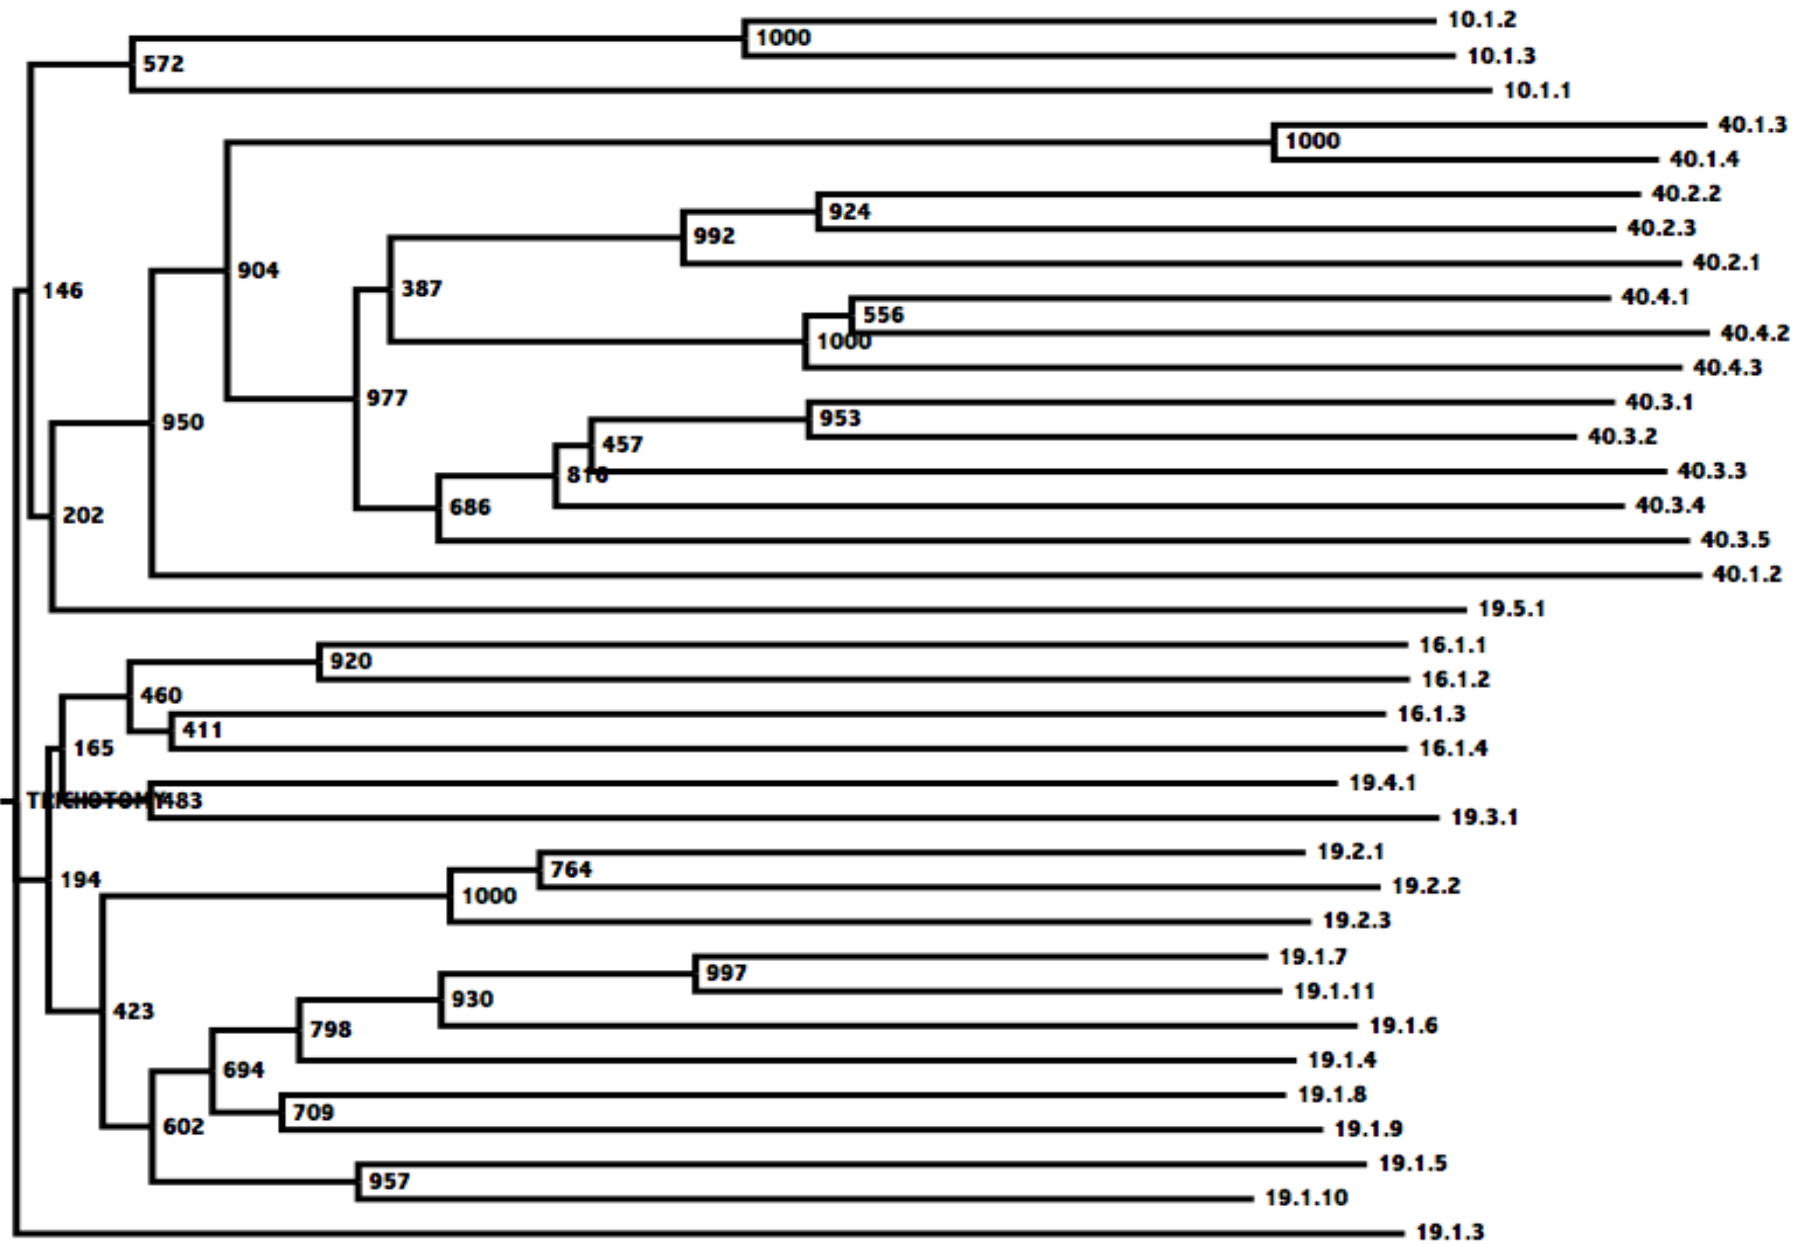



# Figure S5A. Superfamily V ClustalX Alignment

```

29.1.1  -----MDNLSIFIEQQLLILVAALSITIGKGCRRKYKQIDNKYIPWVLLILG--IGFSTWMLGLNFWA--VLOGVIC-WGVAIGINQYKQIK
29.1.2  -----MDNLSIFIEQQLLILVAALYVIGAGCRRKYKQIDNKYIPWVLLALG--IGFSTWMLGLNADS--VLOGVIC-WGVAIGINQYKQIK
29.2.3  ---MDLITFFNSITATVYGFILFVWVAQAIKQI-KIDNHWLPWSIVVGLVGFVAASYIYATDI--WLGAAFQ-FISGFAATGNEVIN
29.2.4  ---MDIITSNLTATAGELALISFFIGVIVQAIKKIGKVKNTYLPFISMGIGILAGLAAVVTKDITN--INGAVAG-LIVGAATSGLTDGLS'
21.1.3  -----MEIVISIAIVLGGVITAL---VNLVKSMEVWAKYLPVVALGIGWVFGVMSPLLG-VTI--YVGAISG-LVAGLSAMGFYELSK
21.1.1  ----MADSELVKSIVALGGVPLILGF-VQLFKRF-ISDIRYPLAVAMGLVINLWASWALGVSAISDWAVLFGIAGMAASGLYSTGS'
21.1.2  ---MEIKKIVEQSELIATILIPVSGFVQVFNILNQDRYVPLSLIVGATIAMTV-MLSAGQSL--NSAIVG-LISGLGACGLYDQKK
29.2.2  -----MTFNIDSNIAILLIHWLVQVLRPT-KINNHLPLVAVIIGALVAVALSLYTKDTKL--VQDWVLG-VWAGFASGLNETAT
29.2.1  -----MNLSDNDVIALIIIIAAVWFVQSSASIKLPSKFLPLWSIVVGIIVSLAYSYLSTKNIQ--LEQDLFFGLFAGFSASGLDDTIT
29.1.3  ----MMEFQLNGGTIAMIAIAIFVIVWVQI--PKNVVLSMIALGIGAVIGIAGFWLNGDIK--VWGLVDG-LVAGAVSVGGNEVFK
29.1.4  -----MDNDYLIPIIVVACLIVGVIR-VTALKIARDYIPLIACILGAILGAVIQDVT-----VEAIMG-AVSGLASGLNQVFR
21.2.1  ----MMEFQKELIVYMFVWVTPVFOAIKKELVPSKWLPLWSILIGAILGALATFLD-GSGS--LATMIWAGALAGAGGIGLFOFTI
21.2.2  ----MMEISTATALAIAIVALVAZLVQVCKY--LSEWVGSFAVAVAVLLGVIAIGATGGFDS--AAWVALAAVVGSNAAYQAVNR

```

Figure S5B. Superfamily V  
Motif Alignment

| Name   | Start | p-value  | Sites <span style="border: 1px solid black; padding: 0 2px;">?</span> |
|--------|-------|----------|-----------------------------------------------------------------------|
| 29.2.3 | 30    | 3.17e-16 | LFTWVAVQAI KQTKIDNHWLPLVSI VVGTLVGFVA                                 |
| 29.1.2 | 28    | 3.95e-13 | ALYVIGAGCK KYKQLDNKYIPVLL ALGIGFSIWM                                  |
| 29.1.1 | 28    | 3.95e-13 | ALSIIGKGCK KYKQLDNKYIPVLL ILGIGFSIWM                                  |
| 29.2.2 | 23    | 6.44e-13 | IITWLVVQVL KPTKINNHLPLVAV IIGALVAVAL                                  |
| 29.1.3 | 28    | 1.07e-11 | IATFVIVWGV KQTPLKNVYLP MIAL GIGAVIGIAF                                |
| 29.2.4 | 31    | 8.72e-11 | FIGVIVQAIK KTGKVKNTYLPFISM GIGILAGLAA                                 |
| 21.1.3 | 24    | 9.58e-11 | VTTALVNLVK SMEVVAPKYLPLVAL GIGMVFGLVM                                 |
| 29.2.1 | 26    | 1.27e-10 | AAVWFVVQSI SATKLPSKFLPLVSI VVGIIVSLAY                                 |
| 29.1.4 | 26    | 1.39e-10 | LIVGYVIRVT PALKIARDYIPLIAC ILGAILGAVI                                 |
| 21.2.1 | 30    | 1.84e-10 | VTPV FVQAIK KTELVP SKWLPTVSI LIGAILGALA                               |
| 21.1.1 | 27    | 4.50e-10 | PLILGFVQLF KPFISDIRYYPL LAV AMGLVINLVA                                |
| 21.1.2 | 31    | 8.96e-10 | IVSGFVQVFK NTLNLQDRYVPLLSL IVGATIAMTV                                 |
| 21.2.2 | 22    | 2.23e-09 | ATAIVALVAP VLTQVCKKYIPSEWV GSEFAVAVAVL                                |

Figure S5C. Superfamily V  
Consensus Motif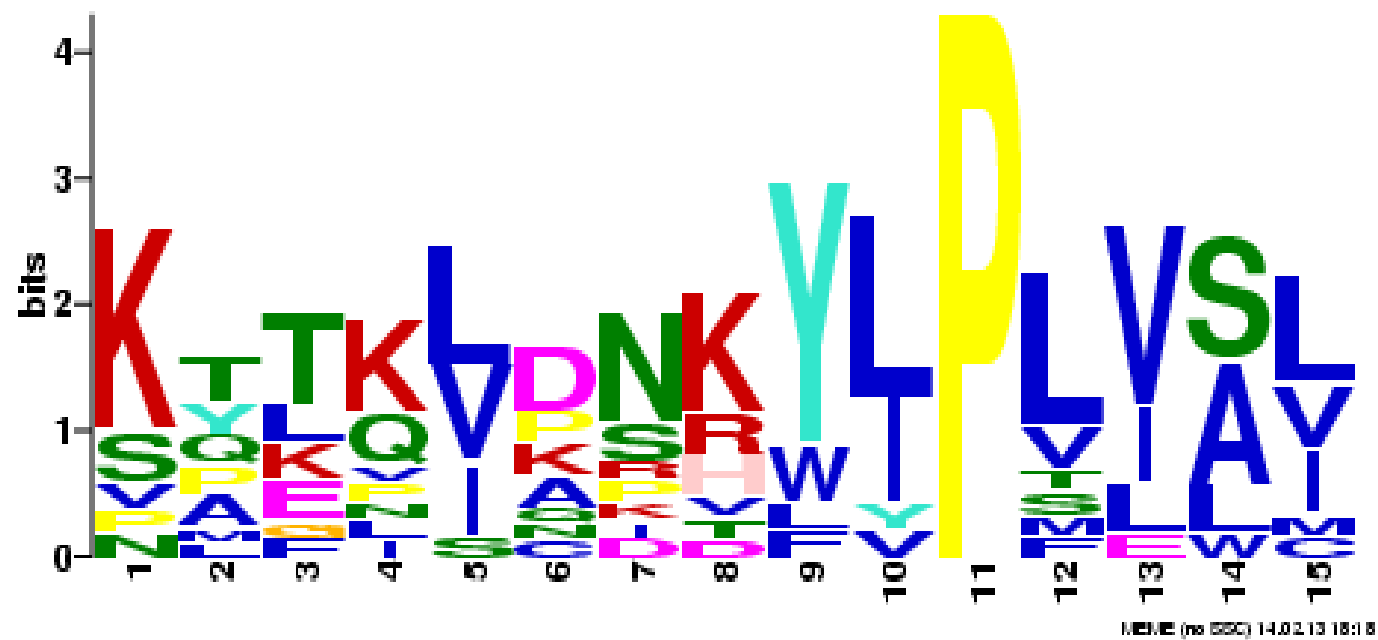

Figure S5D. Superfamily V  
Bootstrap Values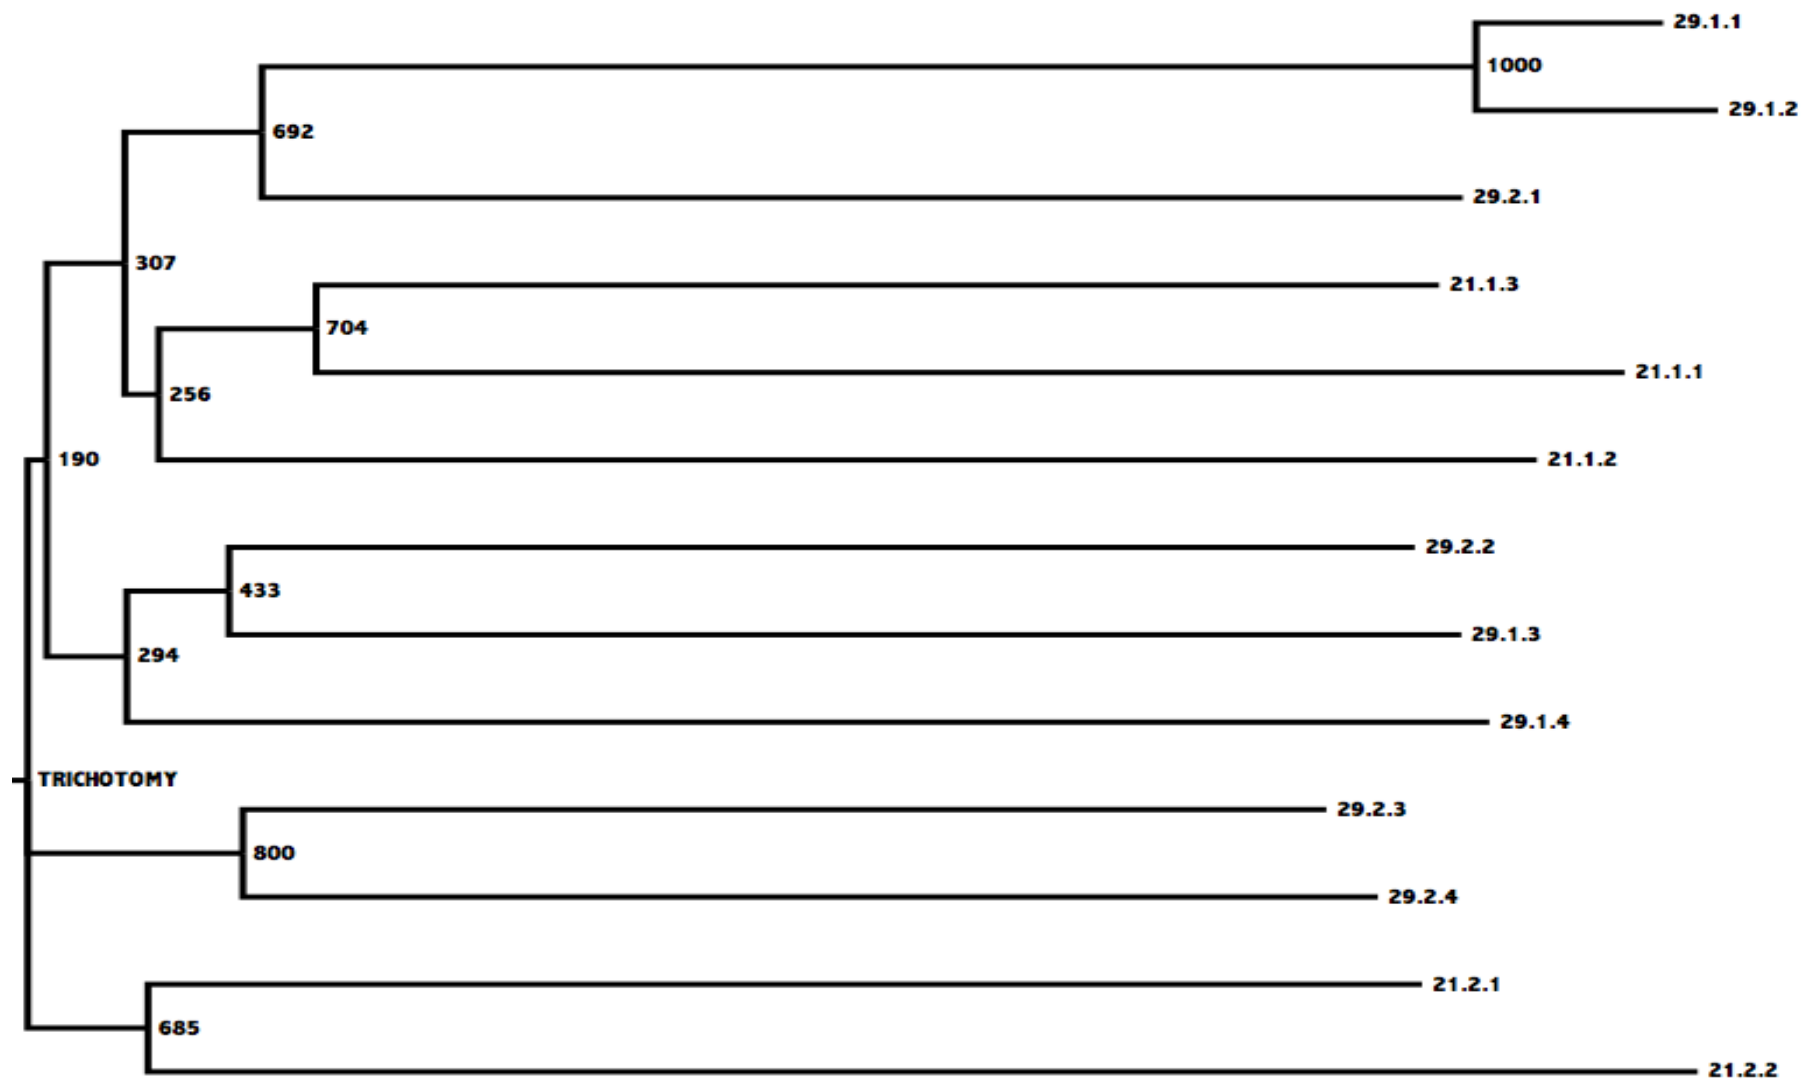

## Figure S6A. Superfamily VI ClustalX Alignment

```

12.2.1 ---MINIKNVTENLFWVSIVILFIAQKIASYDFAQKND-----FDIATKMKHIGLIAKWAVADQSRYADK-AGAAKFEDAVDKVKE-----GVSTTLAKGAVQASYSI--
12.2.2 ----MLKTISSDLEFWVAMVVMYVAGKIASYVEYSKKND-----FEVANKFKHVGELAKWAVADQSRYSK-AGSVKFFDAVKSITNQ-----GVDKSMACGAVQDAYLN-
12.1.1 ---MR--LDENLIWAIIVLLVAGMATAYS LNKGLEKLALH----FKLAKVLEIAGVLAKAIIYQASLDNK-EGSKKLYDATDEVFYQLOKLYENLIDRVTVRNIVQHEYEK--
12.1.2 ---MKEIVINLIWAVVLLVAMFIGAWYKDNQAVVEKIRLH----FEMGHVLDIVGMLAKASNYQETQDDK-NGDQKLDATDSAYNQIKALYPAISISKDTVRNVMVQFAYDT--
26.2.1 ----MEINSLADVITAVAAVSLPIIITYL SKNVKGNRTA-----ETIVSILLENLAKDAVVMQQLGVEKVI-KGEAKKSHAVQIVKQALANLG-FIMIDEATLQNAIHAARYAQ-
26.2.2 ----MNLVNSDLIIAIAVAVIPIVIGAYIVKILKAN-----KFWALLTFLAHDVVAVQKLGVVRYI-EGEAKKSKAVEIVVSALTKLG-FKKADLTTIENAVEDEYS--
12.2.3 -----MKINDYGLLIIVAVIIKSFFDYLKVHD-----FKMAEKFQIVDDIAEWA VSLQATKDIS--NAQKQVNAIQANVEQAKKVG--VETIEASAKGAVEKAVAE--
26.1.3 -----MQQITELITNGAISILVVLAVVVRVAVSEYLAKKVG----EKTIKIVELLAKNAVHAVEVQVAETGY-KGDEKLAQARAKVRAELTKYN--ISMTDKDLDTFVESAVKQ--
26.3.1 ----MDNNTIELQAVALLISTGAIALLTYEVKYG-----VNKVMRVLKIVKIGVKA VEQGLVNGW-DGKQKKAELDYITKTLNSKG--IKVKKADLDMIEHSVVAE--
26.1.5 ----MEEVLLKIVYVAVGVVYILVNSLLKSKKLES-----EVKTIKVIKHAVEVVEQVSKIEDL-HGNQKQYAKTVAKNMLKDLH--INVSDGIIIDTIEHSVVFY--
26.1.1 ----MNEILFSATQIIVVILGLVSRVYIENLVKLDL-----EKASQILAWIQAVTAABQIISGES--KGIEKKAFTVEYMNKLLKEKG--ISITEEQLNLLIHSAVKA--
26.1.2 --MSEFLNELLNLLRPTIMTEVTIILGFLGMKINYYNVKIS----EEQQKQIANIKAAMVEVQVA-GEHL-LSDDKLSMAKHRAKVTLNQVG--IDITDEELTWNIHAFVGG--
26.1.4 ----MREAVLQVEIYILQAVIVVLTFTIVAVVVKRLELLOQ----KIQERYLLVEVANNLVKAIEQTFGAGQEGELKRSEAIKFLMQN-----FKLIEDEAEKLVAAVFE--
26.4.1 ----MDQNMTEIFSGVLTLVGIVVSYFISQAASKHSN-----VKNIDALAKLANQEVTRAEKNFN--ENFEKLSEAINYVTEEAKRIK--IKTNPAQIEAQIETSLAQL-
26.1.6 ----MNTQLIDSLIINATDEVLI VGLLSPELLVQVLRFAKA----HTANKRQVLESYAERVLAVEQQRNL-LSDDKKLAVQRADYINRSKINDCVTDKQISDLIHSAVNS--
12.1.3 ----MFGYIIVNKEEMKEREEDVYHGYCGLCSKLKEHYKFGQIILSYDMVFLMTLISLYEPTIKSMKRQVTHLKHHEERVNNITDYVAHNNILLIYYKCKDDWDDRKLKK--

```

Figure S6B. Superfamily VI  
Motif Alignment

| Name   | Start | <i>p</i> -value | Sites <span style="border: 1px solid black; padding: 0 2px;">?</span>    |
|--------|-------|-----------------|--------------------------------------------------------------------------|
| 12.2.2 | 23    | 3.48e-40        | AMVVMYVAGK IASYEYSKKNDPEVANKFKHVGE <b>LAKWAVADQSRYS</b> DKAG SVKFDDAVKS  |
| 12.2.1 | 25    | 1.07e-35        | SIVILFIAQK IASYDFAQKNDPD <b>IATKMKHIGLIAKWAVADQSR</b> YADKAG AAKFEDAVDK  |
| 12.1.2 | 28    | 1.70e-31        | AMFIGAWYKD NQAKVEKIRLTHPE <b>MGHVLDIVGMLALKASNYQ</b> ETQDDKNG DQKLDDATDS |
| 12.2.3 | 17    | 4.57e-28        | LGLLIIVAWI IKSFFDYLKVKDPK <b>MAEKFQIVDDIAEWAVSLQ</b> ATKDISNA QKQVNATQAV |
| 12.1.1 | 26    | 2.11e-25        | VAGMATAYSL NKQKLEKLAL <b>THPKLAKVLETAGVLALKATIYQ</b> ASLDNKEG SKKLYDATDE |

Figure S6C. Superfamily VI  
Consensus Motif

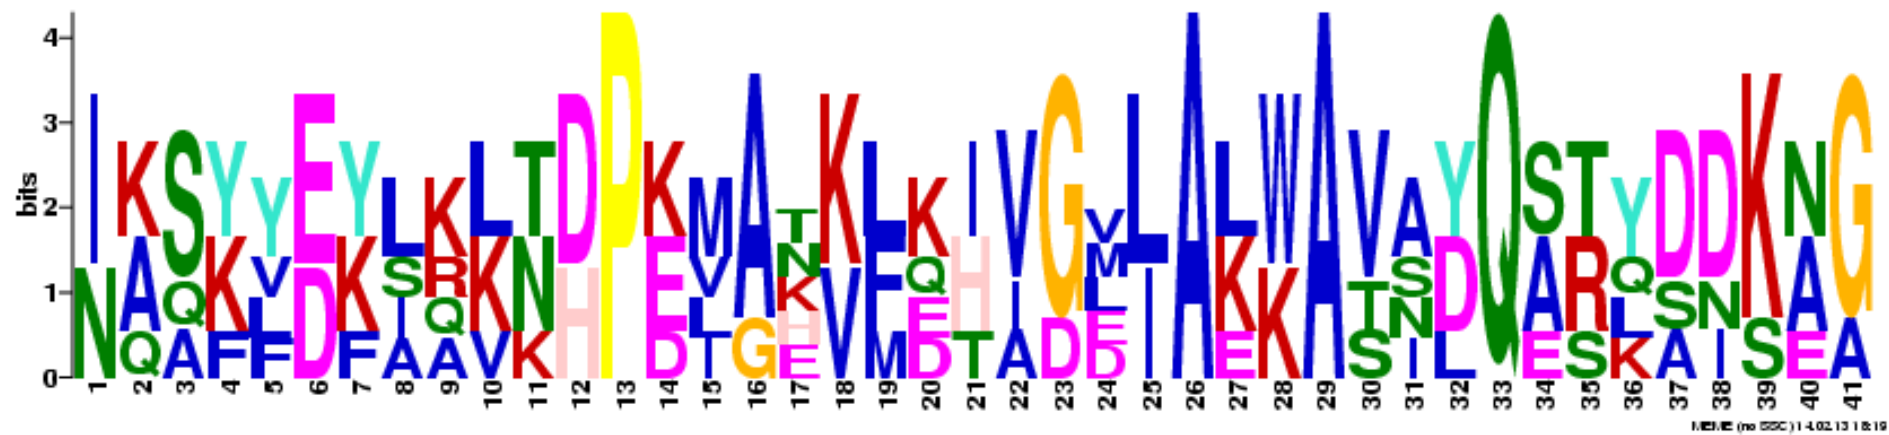

Figure S6D. Superfamily VI  
Bootstrap Values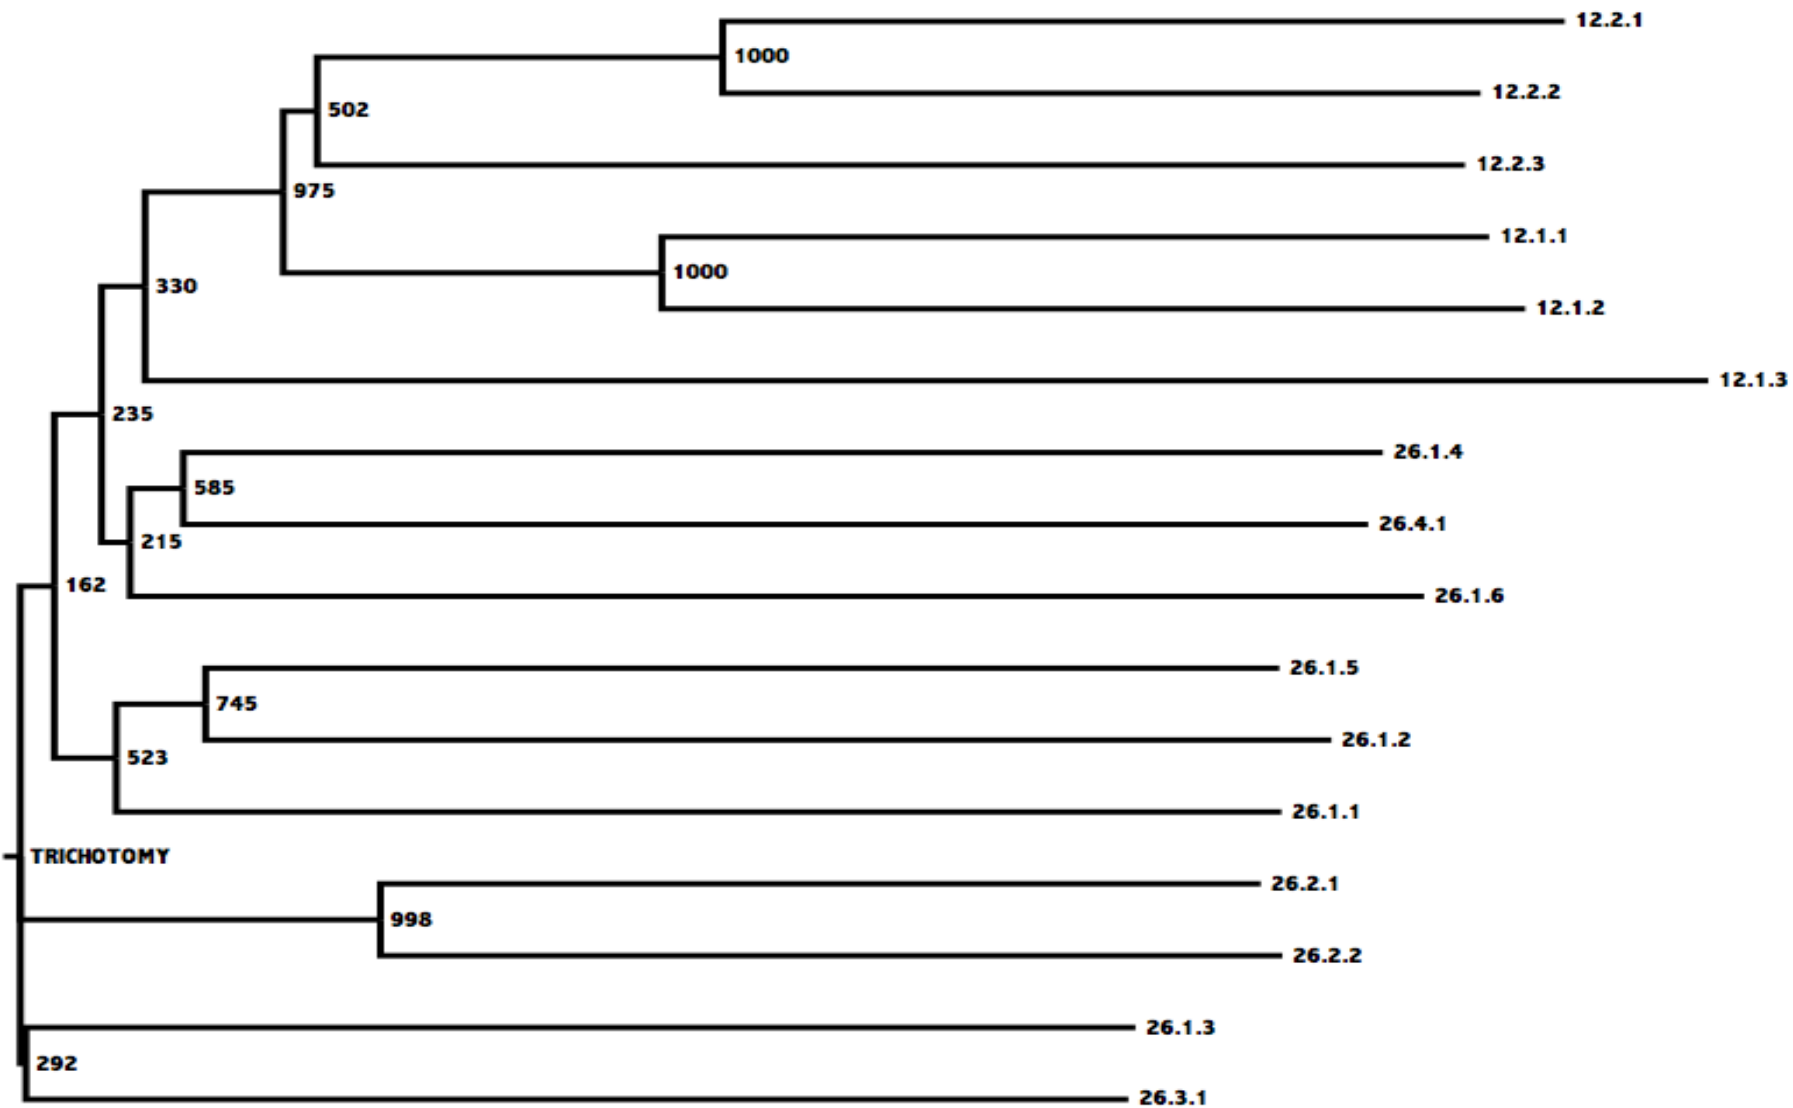



# Figure S7A. Superfamily VII ClustalX Alignment

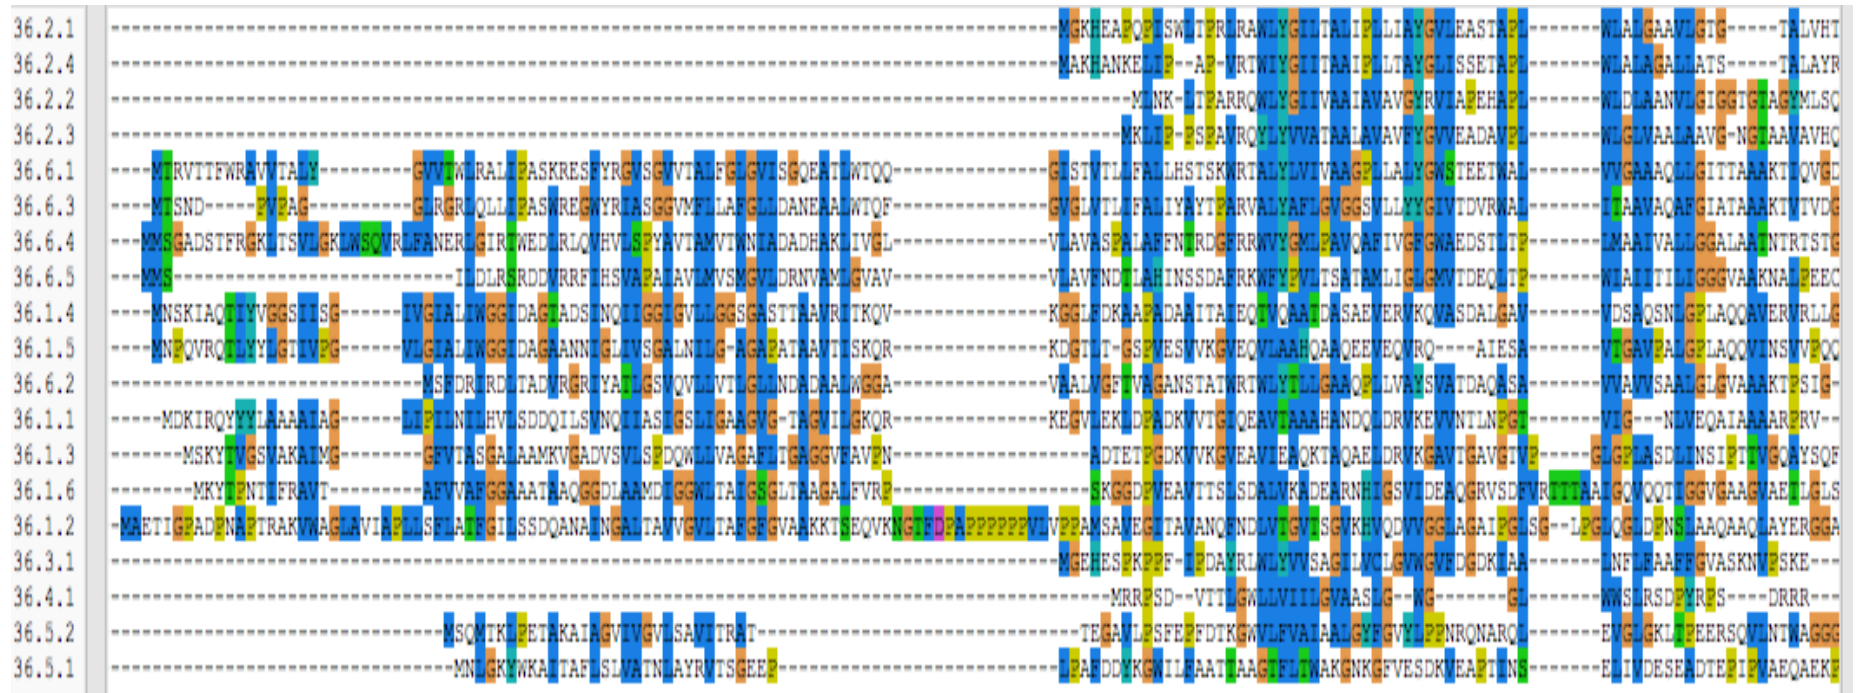

Figure S7B. Superfamily VII  
Motif Alignment

| Name   | Start | <i>p</i> -value | Sites <input type="checkbox"/>              |
|--------|-------|-----------------|---------------------------------------------|
| 36.2.4 | 14    | 1.03e-17        | HANKELIPAP VRTWYIGIITAAIPLLTAYGL ISSETAPLWL |
| 36.2.1 | 17    | 1.03e-17        | PQPISWLTPR LRAWLYGILTALIPLLIAYGV LEASTAPLWL |
| 36.6.2 | 63    | 3.69e-17        | TVAGANSTAT WRTWLYTLLGAAQPLLVAHSV ATDAQASAVV |
| 36.2.2 | 9     | 3.58e-16        | MLNKLTPA RRQWLYGIIVAAIAVAVGYRV IAPEHAPLWL   |
| 36.6.4 | 90    | 1.79e-15        | ALAFFNTRDG FRRWVYGMLPAVQAFIVGFGW AEDSTLTPLM |
| 36.6.5 | 63    | 2.64e-15        | TLAHINSSDA FRKWFYVLTSAAMLIGLGM VTDEQLTPWI   |
| 36.2.3 | 10    | 4.95e-14        | MKLIPPSPA VRQYLYVVATAALAVAVFYGV VEADAVPLWL  |
| 36.6.1 | 80    | 8.33e-14        | LFALLHSTSK WRTALYLVIVAAGPLLALYGW STEETWALVV |
| 36.3.1 | 16    | 4.07e-13        | SPKPPFIPDA YRLWLYVVSAGILVCLGVWGV FDGDKIAALN |

Figure S7C. Superfamily VII  
Consensus Motif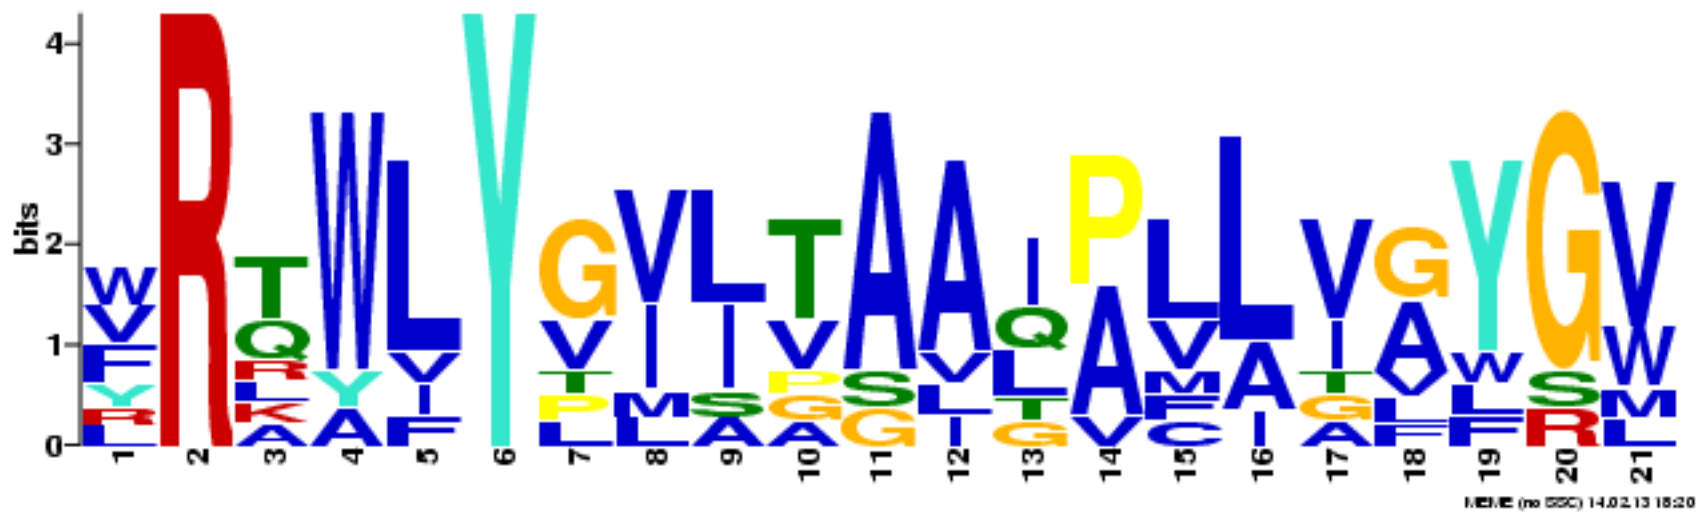

Figure S7D. Superfamily VII  
Bootstrap Values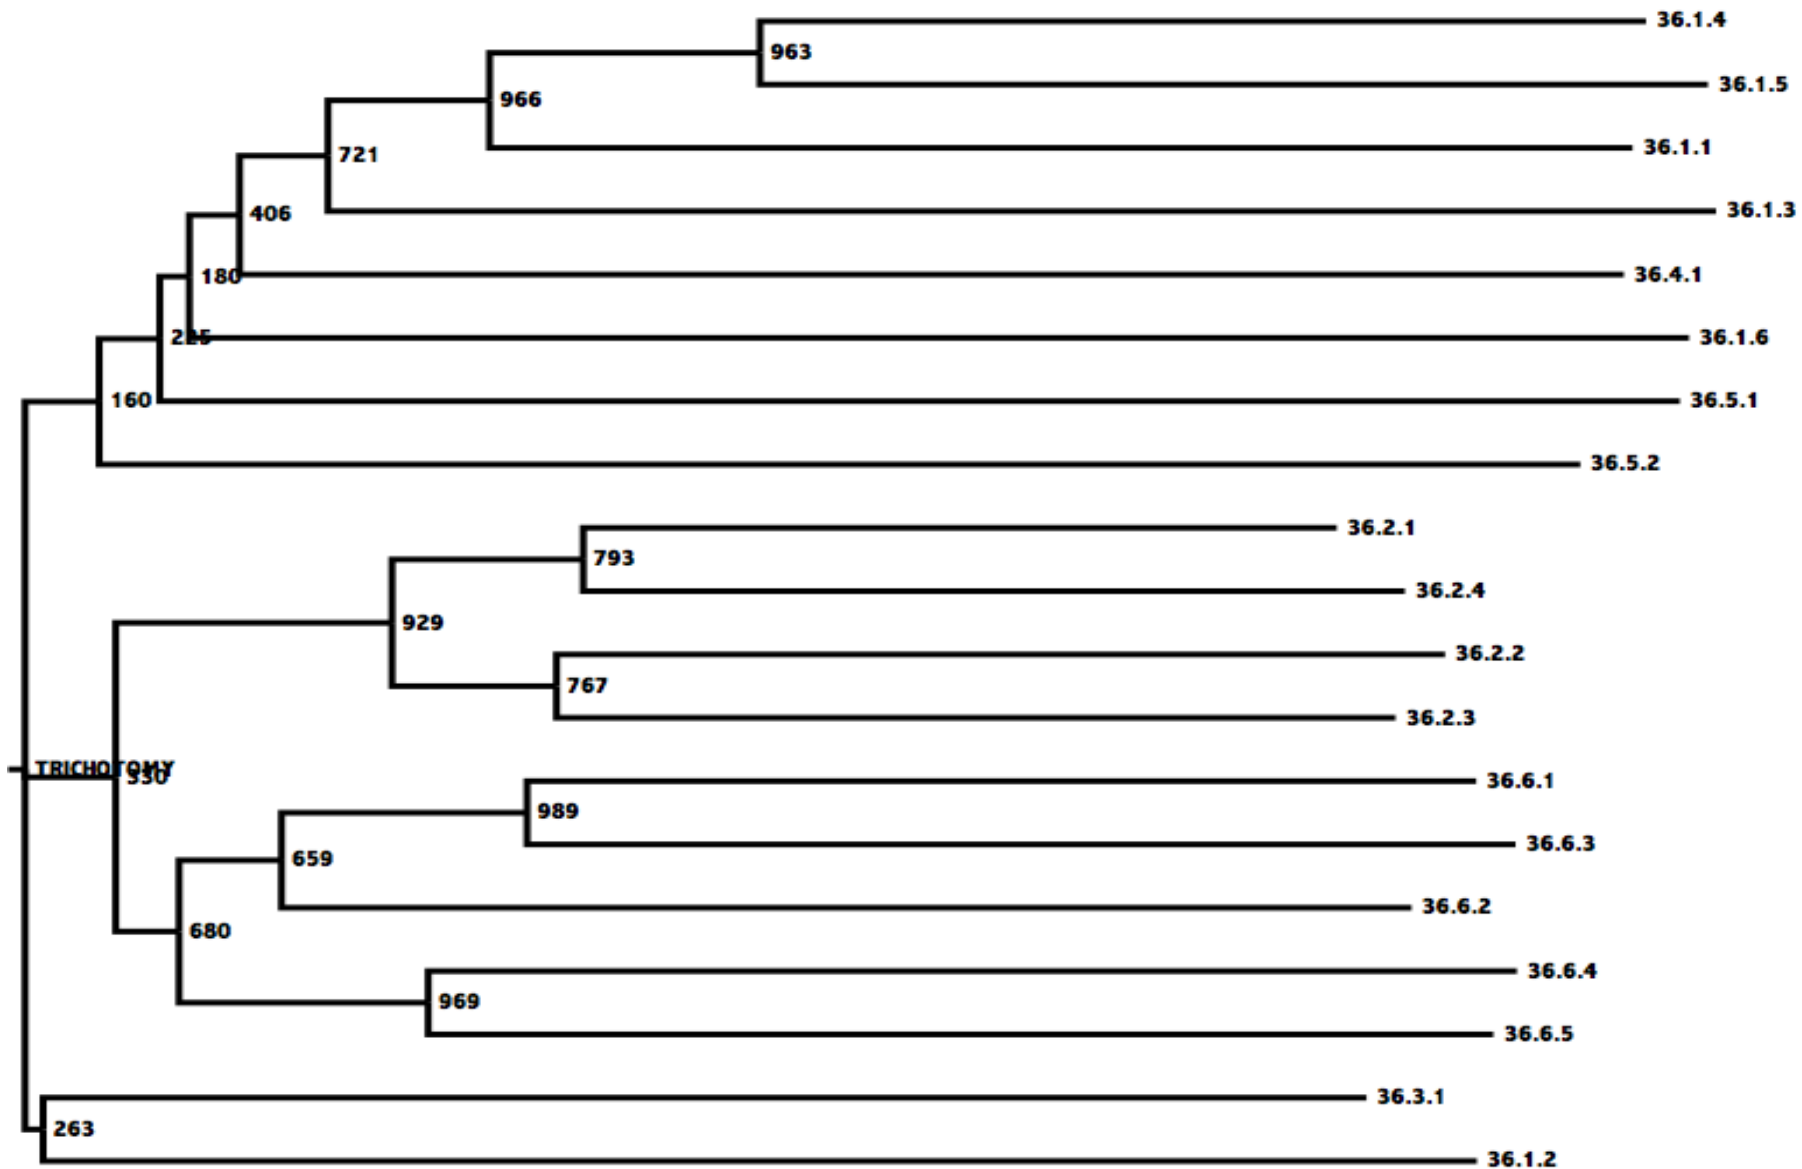

Figure S8: The Mapping of 267 TCDB Sequences to Pfam

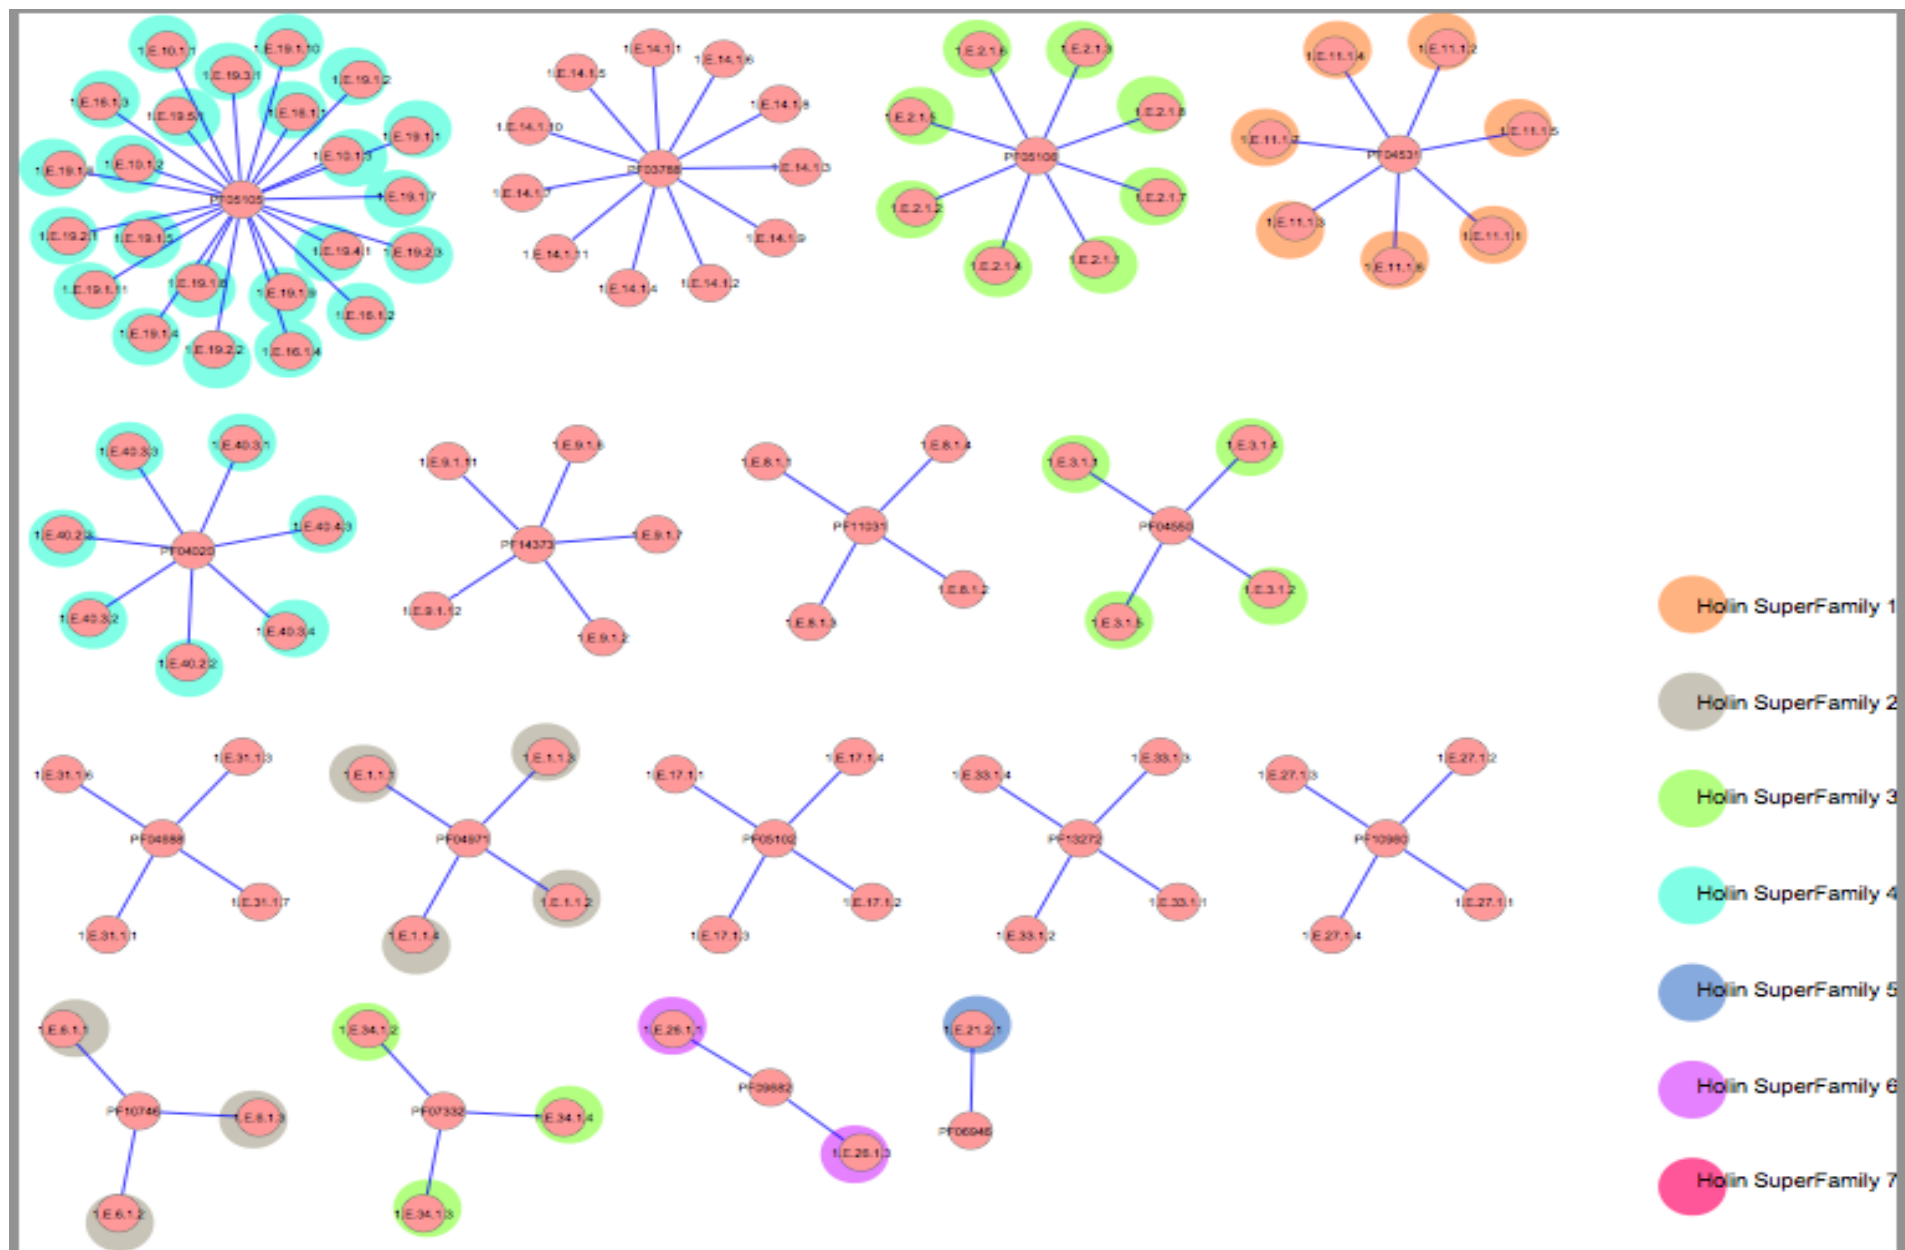

Supplement: NIHMS505800-supplement-01.pdf [file NIHMS505800-supplement-01.pdf]
