# Supplementary material
Source: PubMed Central journal article supplement (PMC3788059)
Supplement: NIHMS505800-supplement-02.pdf [file NIHMS505800-supplement-02.pdf]

**Table S1.** Holin superfamilies arranged according to average protein size and number of TMSs.

| TC#    | Superfamily | TMSs | Average # of Amino Acids |
|--------|-------------|------|--------------------------|
| 1.E.42 |             | 1    | 34                       |
| 1.E.51 |             | 1    | 41                       |
| 1.E.22 |             | 1    | 49                       |
| 1.E.30 |             | 1    | 56±8                     |
| 1.E.37 |             | 1    | 63±8                     |
| 1.E.17 |             | 1    | 66±1                     |
| 1.E.46 |             | 1    | 69                       |
| 1.E.52 |             | 1    | 69                       |
| 1.E.27 |             | 1    | 72±6                     |
| 1.E.6  | II          | 1    | 77±21                    |
| 1.E.7  | II          | 1    | 77±3                     |
| 1.E.35 |             | 1    | 84±7                     |
| 1.E.48 |             | 1    | 106±2                    |
| 1.E.32 |             | 1    | 108±6                    |
| 1.E.12 | VI          | 1    | 135±11                   |
| 1.E.26 | VI          | 1    | 130±26                   |
| 1.E.8  |             | 1    | 210±11                   |
| 1.E.15 |             | 2    | 58                       |
| 1.E.33 | VII         | 2    | 64                       |
| 1.E.45 |             | 2    | 64                       |

|        |     |     |         |
|--------|-----|-----|---------|
| 1.E.44 |     | 2   | 70±12   |
| 1.E.1  | II  | 2   | 71±5    |
| 1.E.24 |     | 2   | 78±9    |
| 1.E.18 |     | 2   | 85±21   |
| 1.E.28 |     | 2   | 85±3    |
| 1.E.25 | II  | 2   | 87±7    |
| 1.E.50 |     | 2   | 87±33   |
| 1.E.38 |     | 2   | 92      |
| 1.E.31 | VII | 2   | 93±22   |
| 1.E.11 | I   | 2   | 97±38   |
| 1.E.9  |     | 2   | 101±26  |
| 1.E.36 | VII | 2/4 | 112±38  |
| 1.E.39 |     | 2   | 116     |
| 1.E.47 |     | 2   | 158     |
| 1.E.34 | III | 2   | 159±30  |
| 1.E.40 | IV  | 2   | 173±149 |
| 1.E.23 |     | 3   | 89±3    |
| 1.E.21 | V   | 3   | 97±10   |
| 1.E.3  | III | 3   | 96±14   |
| 1.E.29 | V   | 3   | 101±2   |
| 1.E.4  | III | 3   | 105±11  |
| 1.E.41 | III | 3   | 108     |

|        |     |     |        |
|--------|-----|-----|--------|
| 1.E.43 |     | 3   | 111±24 |
| 1.E.5  | III | 3   | 112±9  |
| 1.E.2  | III | 3   | 110±7  |
| 1.E.13 |     | 3   | 119±2  |
| 1.E.14 |     | 3   | 129±16 |
| 1.E.10 | IV  | 3   | 138±6  |
| 1.E.16 | IV  | 3/4 | 141±12 |
| 1.E.20 | III | 3   | 143±43 |
| 1.E.19 | IV  | 3   | 149±15 |
| 1.E.49 |     | 4   | 105±5  |
